# Supplementary material for: Association between mobile phone use and neck pain in university students: A cross-sectional study using numeric rating scale for evaluation of neck pain
Source: PLoS One. 2019 May 20;14(5):e0217231. doi: 10.1371/journal.pone.0217231 (PMC6527223; doi:10.1371/journal.pone.0217231)
Supplement: S1 Table — (XLSX) [file pone.0217231.s001.xlsx]

## Sheet: Form responses 1
Your Faculty	Your Gender	Your Age	Handedness	What is the average frequency for your use of your mobile device (in days per week)	What is the average time (in hours per day) do you spend using your mobile device	What is your purpose of using your mobile device	How many Hours do you spend on your device for studying (Answer it if you have chosen studying in the previous question)	How many text messages do you send per day (Answer it if you have chosen texting in the previous question)	Do you hold your mobile in one hand or both hands when you use it	What is your most frequent position when you use your mobile device	Did you experience neck or shoulder pain before	What is the pain site	What is the pain frequency (in days per week)	What is the pain duration (in hours). ( If you Don't have pain, please put 0)	What is the most common timing of the pain	What is the pain's severity on scale of 10, knowing that 10 means the strongest pain you have ever experienced.	Have you ever used analgesia to decrease this pain?	If Yes, What are the types of this Analgesic agents used?	What is the frequency of the use of analgesics agents? (In Days per week)	Have you ever seek medical care due to this pain	Did You Decrease the use of your mobile Device after experiencing this pain	Did You Change your most frequent position while using your mobile Device after experiencing this pain	Did The pain Severity Decrease? how much would you rate the pain's severity on scale of 10, knowing that 10 means the strongest pain you have ever experienced.	Do you think that this pain was related to the use of your mobile device?
Faculty of Medicine	Male	22	Left Handed	7 Day/Week	4	Studying, Texting, Social Media	1	35	One hand	Sitting position	Yes	Neck	2	2	In the morning	4	No	I Did Not Use Any Agent	0 (Do not use analgesics)	No	Yes	Yes	2	Yes
Faculty of Medicine	Male	42	Right Handed	7 Day/Week	3	Studying, Texting, Working	1	5	One hand	Sitting position	Yes	Right Shoulder	2	2	In the Afternoon	6	Yes	Nonsteroidal Anti-Inflammatory Drugs (ibuprofen, panadol naproxen, and Aspirin...etc)	3	No	No	Yes	3	Yes
Faculty of Medicine	Male	40	Right Handed	6 Day/Week	4	Studying, Texting, Working	1	1	One hand	Standing position	Yes	Neck, Right Shoulder	1	3	At night	8	Yes	Nonsteroidal Anti-Inflammatory Drugs (ibuprofen, panadol naproxen, and Aspirin...etc)	1	No	No	Yes	5	Yes
Faculty of Medicine	Male	25	Right Handed	7 Day/Week	2	Studying, Social Media	1		Two hands	Sitting position	Yes	Neck	3	1	In the Afternoon	2	No	I Did Not Use Any Agent	0 (Do not use analgesics)	No	No	No	2	No
Faculty of Medicine	Female	23	Right Handed	7 Day/Week	5	Texting, Social Media, Watching Videos		10	One hand	Supine position (Lying down)	Yes	Right Shoulder, Left Shoulder	1	1	Throughout the day	4	No	I Did Not Use Any Agent	0 (Do not use analgesics)	No	Yes	Yes	1	Yes
Faculty of Medicine	Female	23	Right Handed	1 Day/Week	4	Social Media		5	One hand	Sitting position	Yes	Neck	6	1	In the Afternoon	1	No	I Did Not Use Any Agent	0 (Do not use analgesics)	No	No	Yes	1	Yes
Faculty of Medicine	Female	22	Right Handed	7 Day/Week	5	Studying, Texting, Social Media	1	3	One hand	Sitting position	Yes	Neck, Right Shoulder	7	3	At night	5	Yes	Nonsteroidal Anti-Inflammatory Drugs (ibuprofen, panadol naproxen, and Aspirin...etc)	0 (Do not use analgesics)	No	No	Yes	5	Yes
Faculty of Medicine	Female	22	Right Handed	1 Day/Week	3	Studying, Texting, Social Media	2	5	One hand	Standing position	Yes	Neck	1	1	In the morning	3	No	I Did Not Use Any Agent	0 (Do not use analgesics)	No	Yes	Yes	1	Yes
Faculty of Medicine	Female	22	Right Handed	7 Day/Week	5	Studying, Texting, Social Media	1	3	One hand	Sitting position	Yes	Neck, Right Shoulder	7	3	At night	5	Yes	Nonsteroidal Anti-Inflammatory Drugs (ibuprofen, panadol naproxen, and Aspirin...etc)	0 (Do not use analgesics)	No	No	Yes	5	Yes
Faculty of Medicine	Female	22	Left Handed	7 Day/Week	6	Studying, Texting, Social Media, Watching Videos	1	30	Two hands	Sitting position	Yes	Neck, Left Shoulder	3	1	At night	4	No	I Did Not Use Any Agent	0 (Do not use analgesics)	No	No	Yes	2	Yes
Faculty of Medicine	Female	22	Right Handed	7 Day/Week	16	Studying, Texting, Playing Games, Social Media, Watching Videos	2	5	One hand	Sitting position	Yes	Neck	1	1	At night	1	No	I Did Not Use Any Agent	0 (Do not use analgesics)	No	No	No	1	No
Faculty of Medicine	Female	22	Right Handed	7 Day/Week	5	Studying, Social Media			One hand	Sitting position	Yes	Neck	5	3	Throughout the day	6	Yes	Myogesic	1	No	No	Yes	3	Yes
Faculty of Medicine	Female	22	Right Handed	7 Day/Week	10	Studying, Texting, Working, Social Media, Watching Videos	2	100	One hand	Sitting position	Yes	Neck	2	2	In the Afternoon	4	No	Alternatives to Analgesics: Massage, Alternatives to Analgesics: Rest	0 (Do not use analgesics)	No	No	Yes	2	No
Faculty of Medicine	Male	21	Right Handed	7 Day/Week	3	Texting, Social Media, Watching Videos		50	One hand	Walking position	Yes	Neck	1	4	Throughout the day	5	No	Alternatives to Analgesics: Rest	0 (Do not use analgesics)	No	No	Yes	2	Yes
Faculty of Medicine	Female	22	Left Handed	1 Day/Week	5	Studying, Texting, Social Media	3	50	One hand	Sitting position	Yes	Right Shoulder	1	1	At night	1	No	I Did Not Use Any Agent	0 (Do not use analgesics)	No	Yes	Yes	1	No
Faculty of Medicine	Male	21	Right Handed	7 Day/Week	8	Studying, Texting, Working, Playing Games, Social Media, Watching Videos	6	100	Two hands	Sitting position	Yes	Neck	1	5	Throughout the day	2	No	I Did Not Use Any Agent	0 (Do not use analgesics)	No	No	No	2	No
Faculty of Medicine	Female	23	Right Handed	7 Day/Week	4	Studying, Texting, Working, Social Media, Watching Videos	2	10	Two hands	Sitting position	Yes	Neck	7	1	In the Afternoon	3	No	I Did Not Use Any Agent	1	No	Yes	Yes	1	Yes
Faculty of Medicine	Male	24	Right Handed	7 Day/Week	5	Studying, Texting, Social Media	3	3	Two hands	Standing position	Yes	Neck	2	1	In the morning	4	No	Alternatives to Analgesics: Rest	0 (Do not use analgesics)	No	No	No	4	No
Faculty of Medicine	Male	22	Right Handed	7 Day/Week	2	Studying, Texting, Social Media, Watching Videos	1	15	One hand	Sitting position	Yes	Neck	1	1	In the Afternoon	2	No	I Did Not Use Any Agent	0 (Do not use analgesics)	No	No	No	2	Yes
Faculty of Medicine	Male	24	Right Handed	7 Day/Week	1	Studying, Social Media	1	1	One hand	Sitting position	Yes	Right Shoulder	1	1	At night	2	No	I Did Not Use Any Agent	0 (Do not use analgesics)	No	Yes	Yes	1	Yes
Faculty of Medicine	Female	23	Right Handed	7 Day/Week	12	Studying	12	10	Two hands	Sitting position	Yes	Neck	3	1	Throughout the day	2	No	Nonsteroidal Anti-Inflammatory Drugs (ibuprofen, panadol naproxen, and Aspirin...etc)	0 (Do not use analgesics)	No	No	No	2	Yes
Faculty of Medicine	Female	24	Right Handed	7 Day/Week	4	Studying, Texting, Social Media	1	30	Two hands	Sitting position	Yes	Neck	1	1	In the Afternoon	2	No	I Did Not Use Any Agent	0 (Do not use analgesics)	No	Yes	Yes	1	Yes
Faculty of Medicine	Male	21	Right Handed	7 Day/Week	3	Studying, Social Media	1		One hand	Sitting position	Yes	Neck	1	1	At night	2	No	I Did Not Use Any Agent	0 (Do not use analgesics)	No	No	Yes	2	No
Faculty of Medicine	Female	23	Right Handed	7 Day/Week	3	Studying, Texting, Social Media	1	1000	Two hands	Sitting position	Yes	Neck	1	1	In the morning	3	No	I Did Not Use Any Agent	0 (Do not use analgesics)	No	No	No	2	No
Faculty of Pharmacy	Female	24	Right Handed	7 Day/Week	5	Studying, Texting, Social Media, Watching Videos	2	20	One hand	Supine position (Lying down)	Yes	Left Shoulder	3	4	Throughout the day	6	No	I Did Not Use Any Agent	0 (Do not use analgesics)	No	No	No	1	No
Faculty of Pharmacy	Female	23	Right Handed	5 Day/Week	3	Studying, Texting, Working, Playing Games, Social Media, Watching Videos	2	2	One hand	Supine position (Lying down)	Yes	Neck	1	1	At night	1	No	I Did Not Use Any Agent	0 (Do not use analgesics)	No	Yes	Yes	1	No
Faculty of Medicine	Male	20	Right Handed	7 Day/Week	6	Studying, Texting, Working, Playing Games, Social Media, Watching Videos	2	15	One hand	Sitting position	Yes	Neck	2	1	In the Afternoon	3	No	I Did Not Use Any Agent	0 (Do not use analgesics)	No	Yes	Yes	5	Yes
Faculty of Pharmacy	Female	23	Right Handed	7 Day/Week	15	Studying, Texting, Social Media, Watching Videos	3	10	One hand	Sitting position	Yes	Neck	2	1	In the Afternoon	3	Yes	Alternatives to Analgesics: Massage	0 (Do not use analgesics)	No	Yes	No	2	Yes
Faculty of Pharmacy	Female	24	Right Handed	7 Day/Week	4	Studying, Texting, Social Media, Watching Videos	2	5	Two hands	Sitting position	Yes	Neck	4	1	At night	2	No	I Did Not Use Any Agent	0 (Do not use analgesics)	No	Yes	No	1	Yes
Faculty of Pharmacy	Female	23	Right Handed	7 Day/Week	8	Studying, Texting, Working, Playing Games, Social Media, Watching Videos	3	15	One hand	Sitting position	Yes	Neck	2	1	At night	4	No	I Did Not Use Any Agent	0 (Do not use analgesics)	No	No	No	5	No
Faculty of Pharmacy	Female	20	Right Handed	7 Day/Week	6	Studying, Texting, Social Media, Watching Videos	1	15	Two hands	Sitting position	Yes	Neck	3	2	Throughout the day	4	Yes	Nonsteroidal Anti-Inflammatory Drugs (ibuprofen, panadol naproxen, and Aspirin...etc)	2	No	No	No	4	Yes
Faculty of Medicine	Female	23	Right Handed	7 Day/Week	10	Studying, Texting, Social Media, Watching Videos	6	4	Two hands	Sitting position	Yes	Neck, Right Shoulder, Left Shoulder	3	24	In the morning	7	Yes	Nonsteroidal Anti-Inflammatory Drugs (ibuprofen, panadol naproxen, and Aspirin...etc), Alternatives to Analgesics: Heat, Alternatives to Analgesics: Relaxation techniques	1	No	No	Yes	7	Yes
Faculty of Pharmacy	Female	23	Left Handed	7 Day/Week	6	Studying, Texting, Social Media, Watching Videos	2	20	One hand	Supine position (Lying down)	Yes	Neck, Right Shoulder, Left Shoulder	7	3	Throughout the day	5	Yes	Alternatives to Analgesics: Rest, Alternatives to Analgesics: Relaxation techniques, I Did Not Use Any Agent	0 (Do not use analgesics)	No	Yes	Yes	3	Yes
Faculty of Pharmacy	Female	22	Right Handed	7 Day/Week	15	Studying, Texting, Working, Social Media, Watching Videos	10	10	Two hands	Supine position (Lying down)	Yes	Neck	2	1	At night	4	No	I Did Not Use Any Agent	0 (Do not use analgesics)	No	No	No	4	No
Faculty of Pharmacy	Female	22	Right Handed	7 Day/Week	14	Studying, Texting, Working, Playing Games, Social Media, Watching Videos	1	2	Two hands	Sitting position	Yes	Neck, Right Shoulder, Left Shoulder	4	1	Throughout the day	4	No	I Did Not Use Any Agent	0 (Do not use analgesics)	No	Yes	Yes	2	Yes
Faculty of Pharmacy	Female	21	Right Handed	7 Day/Week	13	Studying, Texting, Social Media, Watching Videos	3	40	One hand	Supine position (Lying down)	Yes	Neck, Left Shoulder	3	3	At night	4	No	I Did Not Use Any Agent	0 (Do not use analgesics)	No	No	No	4	No
Faculty of Pharmacy	Female	24	Right Handed	7 Day/Week	4	Studying, Texting, Playing Games, Social Media, Watching Videos	1	50	One hand	Sitting position	Yes	Neck, Right Shoulder	5	4	In the morning	5	Yes	Nonsteroidal Anti-Inflammatory Drugs (ibuprofen, panadol naproxen, and Aspirin...etc)	2	No	Yes	No	3	Yes
Faculty of Dentistry	Female	22	Right Handed	7 Day/Week	6	Studying, Texting, Working, Social Media, Watching Videos	3	3	One hand	Sitting position	Yes	Neck, Right Shoulder, Left Shoulder	7	2	At night	5	No	I Did Not Use Any Agent	0 (Do not use analgesics)	No	No	Yes	3	No
Faculty of Medicine	Male	22	Right Handed	7 Day/Week	12	Studying, Texting, Working, Playing Games, Social Media, Watching Videos	2	50	Two hands	Sitting position	Yes	Neck	1	1	At night	4	No	I Did Not Use Any Agent	0 (Do not use analgesics)	No	Yes	Yes	2	Yes
Faculty of Medicine	Female	22	Right Handed	6 Day/Week	3	Studying, Texting, Playing Games, Social Media, Watching Videos	2	15	Two hands	Sitting position	Yes	Right Shoulder	1	1	At night	3	No	I Did Not Use Any Agent	0 (Do not use analgesics)	No	Yes	No	1	Yes
Faculty of Medicine	Male	23	Right Handed	7 Day/Week	8	Studying, Texting, Social Media, Watching Videos	1	3	Two hands	Sitting position	Yes	Neck	2	2	At night	2	No	I Did Not Use Any Agent	0 (Do not use analgesics)	No	No	Yes	1	No
Faculty of Medicine	Male	21	Right Handed	7 Day/Week	3	Texting, Social Media, Watching Videos		20	Two hands	Sitting position	Yes	Neck	1	1	At night	2	No	I Did Not Use Any Agent	0 (Do not use analgesics)	No	No	No	2	Yes
Faculty of Pharmacy	Female	24	Right Handed	7 Day/Week	7	Studying, Texting, Playing Games, Social Media, Watching Videos	1	10	One hand	Supine position (Lying down)	Yes	Neck, Right Shoulder, Left Shoulder	5	12	Throughout the day	7	Yes	Nonsteroidal Anti-Inflammatory Drugs (ibuprofen, panadol naproxen, and Aspirin...etc)	3	No	No	Yes	5	No
Faculty of Pharmacy	Female	22	Right Handed	7 Day/Week	7	Texting, Working		3	One hand	Sitting position	Yes	Neck, Right Shoulder, Left Shoulder	2	1	At night	2	Yes	Nonsteroidal Anti-Inflammatory Drugs (ibuprofen, panadol naproxen, and Aspirin...etc), Alternatives to Analgesics: Massage, Alternatives to Analgesics: Rest, Alternatives to Analgesics: Relaxation techniques	1	No	Yes	Yes	2	Yes
Faculty of Medicine	Male	24	Right Handed	7 Day/Week	3	Studying, Social Media, Watching Videos	1	3	One hand	Sitting position	Yes	Neck	6	1	Throughout the day	2	No	I Did Not Use Any Agent	0 (Do not use analgesics)	No	No	Yes	1	Yes
Faculty of Medicine	Female	21	Right Handed	7 Day/Week	6	Studying, Texting, Working, Playing Games, Social Media, Watching Videos	2	60	One hand	Sitting position	Yes	Neck	1	4	In the morning	2	No	I Did Not Use Any Agent	0 (Do not use analgesics)	No	No	No	1	Yes
Faculty of Medicine	Female	22	Right Handed	4 Day/Week	4	Texting, Social Media, Watching Videos	1	20	One hand	Sitting position	Yes	Right Shoulder, Left Shoulder	2	1	At night	3	No	I Did Not Use Any Agent	0 (Do not use analgesics)	No	No	No	3	Yes
Faculty of Medicine	Female	21	Right Handed	7 Day/Week	3	Studying, Texting, Working, Social Media	3	3	One hand	Sitting position	Yes	Neck, Right Shoulder, Left Shoulder	4	1	In the morning	5	No	I Did Not Use Any Agent	0 (Do not use analgesics)	No	Yes	No	3	Yes
Faculty of Medicine	Male	22	Right Handed	5 Day/Week	1	Studying, Social Media	1	5	One hand	Sitting position	Yes	Neck, Right Shoulder, Left Shoulder	5	1	In the Afternoon	4	Yes	Nonsteroidal Anti-Inflammatory Drugs (ibuprofen, panadol naproxen, and Aspirin...etc)	2	No	Yes	Yes	4	Yes
Faculty of Medicine	Female	23	Right Handed	6 Day/Week	3	Studying, Texting, Social Media	1.5	4	Two hands	Sitting position	Yes	Neck	1	1	At night	3	No	I Did Not Use Any Agent	0 (Do not use analgesics)	No	No	Yes	3	Yes
Faculty of Medicine	Female	22	Right Handed	7 Day/Week	7	Studying, Texting, Social Media, Watching Videos	1	150	Two hands	Sitting position	Yes	Neck, Right Shoulder, Left Shoulder	7	12	In the morning	7	No	I Did Not Use Any Agent	0 (Do not use analgesics)	Yes, I've visited the Clinic	No	No	8	Yes
Faculty of Medicine	Female	21	Right Handed	7 Day/Week	10	Studying, Texting, Playing Games, Social Media	4	1000	One hand	Sitting position	Yes	Neck	3	2	At night	4	No	Alternatives to Analgesics: Rest, I Did Not Use Any Agent	0 (Do not use analgesics)	No	No	No	2	No
Faculty of Medicine	Female	24	Right Handed	1 Day/Week	12	Studying, Social Media	3	3	One hand	Sitting position	Yes	Neck	1	1	In the Afternoon	1	Yes	Nonsteroidal Anti-Inflammatory Drugs (ibuprofen, panadol naproxen, and Aspirin...etc)	0 (Do not use analgesics)	No	No	Yes	1	No
Faculty of Medicine	Female	21	Right Handed	7 Day/Week	4	Studying, Texting, Social Media, Watching Videos	1	15	One hand	Sitting position	Yes	Right Shoulder	3	1	In the morning	3	No	I Did Not Use Any Agent	0 (Do not use analgesics)	No	No	Yes	3	No
Faculty of Medicine	Female	21	Right Handed	7 Day/Week	10	Studying, Texting, Social Media, Watching Videos	2		One hand	Standing position	Yes	Left Shoulder	4	5	At night	3	No	I Did Not Use Any Agent	0 (Do not use analgesics)	No	No	No	3	No
Faculty of Pharmacy	Female	24	Right Handed	7 Day/Week	8	Studying, Texting, Working, Playing Games, Social Media, Watching Videos	2	50	One hand	Sitting position	Yes	Neck	2	2	At night	4	Yes	Nonsteroidal Anti-Inflammatory Drugs (ibuprofen, panadol naproxen, and Aspirin...etc)	2	No	No	No	4	Yes
Faculty of Pharmacy	Female	22	Right Handed	7 Day/Week	10	Watching Videos	2		One hand	Sitting position	Yes	Neck, Left Shoulder	1	1	At night	5	No	I Did Not Use Any Agent	0 (Do not use analgesics)	No	Yes	Yes	1	Yes
Faculty of Medicine	Male	25	Left Handed	7 Day/Week	10	Studying, Texting, Playing Games, Social Media, Watching Videos	1	50	One hand	Sitting position	Yes	Neck	1	2	At night	5	Yes	Nonsteroidal Anti-Inflammatory Drugs (ibuprofen, panadol naproxen, and Aspirin...etc)	1	No	No	Yes	3	Yes
Faculty of Medicine	Male	25	Right Handed	7 Day/Week	5	Texting, Social Media	1	150	One hand	Sitting position	Yes	Neck	1	1	Throughout the day	5	Yes	I Did Not Use Any Agent	1	No	No	No	5	No
Faculty of Medicine	Female	21	Right Handed	7 Day/Week	8	Studying, Texting, Social Media	3	2	One hand	Sitting position	Yes	Neck, Right Shoulder	1	1		1	No	I Did Not Use Any Agent	0 (Do not use analgesics)	No	No	No	1	No
Faculty of Pharmacy	Female	22	Right Handed	7 Day/Week	5	Studying, Texting, Social Media	2	2	One hand	Sitting position	Yes	Neck	3	1	At night	3	No	I Did Not Use Any Agent	0 (Do not use analgesics)	No	No	No	3	Yes
Faculty of Pharmacy	Female	22	Right Handed	7 Day/Week	3	Studying, Watching Videos	3	10	One hand	Sitting position	Yes	Neck	1	1	Throughout the day	2	No	I Did Not Use Any Agent	0 (Do not use analgesics)	No	Yes	Yes	1	Yes
Faculty of Pharmacy	Female	30	Right Handed	7 Day/Week	4	Texting, Working, Social Media, Watching Videos	1	10	One hand	Sitting position	Yes	Neck	1	1	At night	1	No	I Did Not Use Any Agent	0 (Do not use analgesics)	No	No	No	1	No
Faculty of Medicine	Male	21	Right Handed	5 Day/Week	1	Studying, Social Media	1		One hand	Sitting position	Yes	Neck	2	2	In the morning	5	No	Alternatives to Analgesics: Rest	0 (Do not use analgesics)	No	No	Yes	5	Yes
Faculty of Medicine	Male	24	Right Handed	7 Day/Week	7	Studying, Texting, Playing Games, Social Media	2	100	One hand	Supine position (Lying down)	Yes	Neck, Right Shoulder	7	6	Throughout the day	7	Yes	Nonsteroidal Anti-Inflammatory Drugs (ibuprofen, panadol naproxen, and Aspirin...etc), Alternatives to Analgesics: Massage, Alternatives to Analgesics: Rest	2	Yes, I've visited the Clinic	No	No	7	Yes
Faculty of Medicine	Female	19	Right Handed	7 Day/Week	7	Studying, Texting, Playing Games, Social Media, Watching Videos	3	10	One hand	Supine position (Lying down)	Yes	Neck, Right Shoulder	6	10	Throughout the day	6	No	I Did Not Use Any Agent	0 (Do not use analgesics)	No	No	Yes	6	Yes
Faculty of Pharmacy	Male	22	Right Handed	7 Day/Week	6	Studying, Texting, Social Media, Watching Videos	3	2	One hand	Standing position	Yes	Right Shoulder	2	1	In the morning	4	No	I Did Not Use Any Agent	0 (Do not use analgesics)	No	No	Yes	2	No
Faculty of Medicine	Female	19	Right Handed	7 Day/Week	6	Studying, Texting, Working, Social Media, Watching Videos	4	4	One hand	Sitting position	Yes	Neck, Right Shoulder, Left Shoulder	3	1	Throughout the day	5	No	I Did Not Use Any Agent	0 (Do not use analgesics)	No	Yes	No	5	Yes
Faculty of Medicine	Female	20	Right Handed	7 Day/Week	1	Texting, Social Media		20	One hand	Standing position	Yes	Neck	1	24	Throughout the day	6	Yes	acetaminophen	1	No	Yes	Yes	6	Yes
Faculty of Medicine	Male	19	Right Handed	7 Day/Week	7	Studying, Texting, Social Media, Watching Videos	1	1	One hand	Sitting position	Yes	Left Shoulder	7	18	Throughout the day	8	Yes	Nonsteroidal Anti-Inflammatory Drugs (ibuprofen, panadol naproxen, and Aspirin...etc), Alternatives to Analgesics: Heat, Alternatives to Analgesics: Massage, Alternatives to Analgesics: Rest	1	Yes, I've Visited the Emergency Department	No	No	1	No
Faculty of Medicine	Female	18	Right Handed	7 Day/Week	5	Studying, Texting, Playing Games, Social Media, Watching Videos	2	50	One hand	Supine position (Lying down)	Yes	Neck, Right Shoulder, Left Shoulder	1	1	Throughout the day	4	No	I Did Not Use Any Agent	0 (Do not use analgesics)	No	Yes	Yes	2	Yes
Faculty of Medicine	Female	23	Right Handed	1 Day/Week	4	Social Media		5	One hand	Sitting position	Yes	Neck	6	1	In the Afternoon	1	No	I Did Not Use Any Agent	0 (Do not use analgesics)	No	No	Yes	1	Yes
Faculty of Pharmacy	Female	23	Right Handed	7 Day/Week	2	Studying, Social Media, Watching Videos	4	2	Two hands	Sitting position	Yes	Neck	1	1	At night	2	No	I Did Not Use Any Agent	0 (Do not use analgesics)	No	No	No	2	No
Faculty of Medicine	Female	19	Right Handed	1 Day/Week	5	Studying, Texting, Playing Games, Social Media, Watching Videos	2	5	Two hands	Sitting position	Yes	Neck	3	1	Throughout the day	7	Yes	Nonsteroidal Anti-Inflammatory Drugs (ibuprofen, panadol naproxen, and Aspirin...etc), Alternatives to Analgesics: Heat, Alternatives to Analgesics: Massage, Alternatives to Analgesics: Rest, Alternatives to Analgesics: Relaxation techniques	1	No	Yes	Yes	4	Yes
Faculty of Medicine	Female	20	Right Handed	7 Day/Week	6	Texting, Social Media, Watching Videos		15	Two hands	Supine position (Lying down)	Yes	Neck	1	3	In the morning	4	Yes	Nonsteroidal Anti-Inflammatory Drugs (ibuprofen, panadol naproxen, and Aspirin...etc), Alternatives to Analgesics: Massage, Alternatives to Analgesics: Rest, Alternatives to Analgesics: Relaxation techniques	2	No	Yes	No	2	No
Faculty of Medicine	Female	21	Right Handed	7 Day/Week	5	Studying, Texting, Playing Games, Social Media, Watching Videos	2	40	Two hands	Sitting position	Yes	Neck	2	1	In the Afternoon	2	No	Alternatives to Analgesics: Massage, I Did Not Use Any Agent	0 (Do not use analgesics)	No	No	No	2	No
Faculty of Medicine	Male	20	Right Handed	7 Day/Week	6	Studying, Playing Games, Social Media, Watching Videos	4		One hand	Sitting position	Yes	Neck, Right Shoulder	3	5	Throughout the day	5	No	I Did Not Use Any Agent	0 (Do not use analgesics)	No	No	Yes	1	Yes
Faculty of Pharmacy	Female	25	Right Handed	7 Day/Week	5	Studying, Texting, Social Media, Watching Videos	3	2	Two hands	Supine position (Lying down)	Yes	Neck	3	1	At night	3	No	I Did Not Use Any Agent	0 (Do not use analgesics)	No	No	Yes	3	Yes
Faculty of Pharmacy	Female	24	Right Handed	5 Day/Week	5	Studying, Texting, Social Media	4	15	Two hands	Sitting position	Yes	Neck	1	1	In the Afternoon	1	No	I Did Not Use Any Agent	0 (Do not use analgesics)	No	No	No	1	Yes
Faculty of Medicine	Male	23	Right Handed	7 Day/Week	24	Studying, Texting, Playing Games, Social Media, Watching Videos	3	5	Two hands	Sitting position	Yes	Neck, Left Shoulder	2	2	In the morning	4	No	I Did Not Use Any Agent	0 (Do not use analgesics)	No	No	Yes	4	Yes
Faculty of Pharmacy	Female	25	Right Handed	5 Day/Week	10	Studying, Texting, Working, Social Media, Watching Videos	2	100	One hand	Sitting position	Yes	Neck, Right Shoulder, Left Shoulder	4	2	At night	6	Yes	Nonsteroidal Anti-Inflammatory Drugs (ibuprofen, panadol naproxen, and Aspirin...etc)	2	Yes, I've visited the Clinic	Yes	Yes	3	Yes
Faculty of Pharmacy	Female	23	Right Handed	7 Day/Week	5	Studying, Texting, Social Media, Watching Videos	2	5	Two hands	Sitting position	Yes	Neck, Right Shoulder	4	2	In the Afternoon	6	Yes	Alternatives to Analgesics: Heat, Alternatives to Analgesics: Massage, Alternatives to Analgesics: Rest, orphenadrine	1	No	No	Yes	5	Yes
Faculty of Medicine	Male	22	Right Handed	7 Day/Week	6	Studying, Working, Social Media	4		One hand	Sitting position	Yes	Neck, Right Shoulder	4	1	At night	4	No	I Did Not Use Any Agent	0 (Do not use analgesics)	No	Yes	Yes	1	Yes
Faculty of Medicine	Male	17	Right Handed	7 Day/Week	4	Social Media			One hand	Sitting position	Yes	Neck	2	1	At night	4	No	I Did Not Use Any Agent	0 (Do not use analgesics)	No	Yes	Yes	1	Yes
Faculty of Medicine	Female	18	Right Handed	1 Day/Week	3	Watching Videos			Two hands	Supine position (Lying down)	Yes	Left Shoulder	5	3	Throughout the day	7	Yes	Nonsteroidal Anti-Inflammatory Drugs (ibuprofen, panadol naproxen, and Aspirin...etc), Alternatives to Analgesics: Heat, Alternatives to Analgesics: Massage, Alternatives to Analgesics: Rest	3	No	No	Yes	7	No
Faculty of Medicine	Female	23	Right Handed	7 Day/Week	5	Studying, Texting, Playing Games, Social Media, Watching Videos	1	10	One hand	Supine position (Lying down)	Yes	Neck	1	1	At night	3	No	I Did Not Use Any Agent	0 (Do not use analgesics)	No	Yes	Yes	1	Yes
Faculty of Medicine	Female	23	Right Handed	7 Day/Week	4	Studying, Texting, Social Media, Watching Videos	1	7	Two hands	Supine position (Lying down)	Yes	Neck	1	1	At night	2	No	I Did Not Use Any Agent	0 (Do not use analgesics)	No	No	Yes	1	Yes
Faculty of Medicine	Female	21	Right Handed	7 Day/Week	4	Studying, Texting, Social Media, Watching Videos	4	10	Two hands	Supine position (Lying down)	Yes	Right Shoulder, Left Shoulder	2	4	At night	3	No	I Did Not Use Any Agent	3	No	No	No	1	No
Faculty of Medicine	Female	20	Right Handed	1 Day/Week	3	Studying, Texting, Social Media, Watching Videos	1	37	One hand	Sitting position	Yes	Right Shoulder	3	1	In the morning	2	Yes	Nonsteroidal Anti-Inflammatory Drugs (ibuprofen, panadol naproxen, and Aspirin...etc)	1	No	Yes	Yes	1	Yes
Faculty of Medicine	Male	18	Right Handed	7 Day/Week	13	Texting, Playing Games, Social Media, Watching Videos		6	Two hands	Supine position (Lying down)	Yes	Right Shoulder	3	2	At night	6	No	I Did Not Use Any Agent	0 (Do not use analgesics)	No	No	No	7	No
Faculty of Dentistry	Female	21	Right Handed	7 Day/Week	4	Studying, Texting, Working, Social Media, Watching Videos	2	3	One hand	Supine position (Lying down)	Yes	Right Shoulder, Left Shoulder	5	1	In the Afternoon	5	No	I Did Not Use Any Agent	0 (Do not use analgesics)	No	Yes	Yes	2	Yes
Faculty of Medicine	Female	20	Right Handed	7 Day/Week	3	Studying, Texting, Social Media	2	5	Two hands	Sitting position	Yes	Neck	1	2	In the Afternoon	2	No	I Did Not Use Any Agent	0 (Do not use analgesics)	No	No	Yes	1	Yes
Faculty of Medicine	Female	35	Right Handed	7 Day/Week	3	Working, Social Media			One hand	Supine position (Lying down)	Yes	Neck	1	1	At night	2	No	I Did Not Use Any Agent	0 (Do not use analgesics)	No	No	No	1	No
Faculty of Medicine	Male	21	Right Handed	7 Day/Week	4	Social Media			One hand	Sitting position	Yes	Neck	1	1	At night	8	Yes	Nonsteroidal Anti-Inflammatory Drugs (ibuprofen, panadol naproxen, and Aspirin...etc), Alternatives to Analgesics: Massage	1	No	No	No	7	No
Faculty of Medicine	Female	22	Right Handed	7 Day/Week	4	Studying, Texting, Working, Playing Games, Social Media, Watching Videos	2	20	One hand	Sitting position	Yes	Neck	1	1	At night	3	No	I Did Not Use Any Agent	0 (Do not use analgesics)	No	No	Yes	1	No
Faculty of Medicine	Female	22	Left Handed	1 Day/Week	5	Studying, Texting, Social Media	3	50	One hand	Sitting position	Yes	Right Shoulder	1	1	At night	1	No	I Did Not Use Any Agent	0 (Do not use analgesics)	No	Yes	Yes	1	No
Faculty of Dentistry	Female	19	Right Handed	7 Day/Week	15	Texting, Social Media, Watching Videos	1	100	One hand	Sitting position	Yes	Neck, Left Shoulder	5	5	At night	5	No	Nonsteroidal Anti-Inflammatory Drugs (ibuprofen, panadol naproxen, and Aspirin...etc)	0 (Do not use analgesics)	No	No	Yes	5	Yes
Faculty of Medicine	Male	19	Right Handed	7 Day/Week	3	Social Media, Watching Videos			Two hands	Supine position (Lying down)	Yes	Neck, Left Shoulder	1	1	Throughout the day	2	Yes	Nonsteroidal Anti-Inflammatory Drugs (ibuprofen, panadol naproxen, and Aspirin...etc), Alternatives to Analgesics: Massage, Alternatives to Analgesics: Rest, Alternatives to Analgesics: Relaxation techniques	0 (Do not use analgesics)	No	No	Yes	1	No
Faculty of Medicine	Female	20	Right Handed	7 Day/Week	22.5	Studying, Social Media, Watching Videos	1		One hand	Supine position (Lying down)	Yes	Neck	3	3.5	Throughout the day	8	Yes	Nonsteroidal Anti-Inflammatory Drugs (ibuprofen, panadol naproxen, and Aspirin...etc), Alternatives to Analgesics: Massage, Alternatives to Analgesics: Relaxation techniques	1	No	No	Yes	7	Yes
Faculty of Medicine	Female	19	Right Handed	7 Day/Week	4	Texting, Social Media, Watching Videos		50	Two hands	Supine position (Lying down)	Yes	Neck, Right Shoulder	5	5	In the Afternoon	5	Yes	Nonsteroidal Anti-Inflammatory Drugs (ibuprofen, panadol naproxen, and Aspirin...etc), Alternatives to Analgesics: Heat, Alternatives to Analgesics: Rest	2	No	No	No	5	No
Faculty of Medicine	Female	23	Right Handed	7 Day/Week	7	Studying, Texting, Social Media, Watching Videos	6	30	Two hands	Sitting position	Yes	Neck	2	1	At night	3	No	Nonsteroidal Anti-Inflammatory Drugs (ibuprofen, panadol naproxen, and Aspirin...etc)	0 (Do not use analgesics)	No	Yes	Yes	3	No
Faculty of Dentistry	Male	19	Right Handed	1 Day/Week	5	Texting, Watching Videos	1	10	One hand	Standing position	Yes	Neck, Right Shoulder	2	1	At night	5	No	I Did Not Use Any Agent	0 (Do not use analgesics)	No	No	No	5	No
Faculty of Dentistry	Female	18	Right Handed	1 Day/Week	24	Studying, Texting, Social Media, Watching Videos	5	300	One hand	Sitting position	Yes	Neck, Right Shoulder, Left Shoulder	2	3	In the morning	5	No	I Did Not Use Any Agent	2	No	No	No	4	Yes
Faculty of Medicine	Female	19	Left Handed	1 Day/Week	4	Studying, Texting, Watching Videos	1	2	One hand	Sitting position	Yes	Neck	2	2	At night	5	No	I Did Not Use Any Agent	0 (Do not use analgesics)	No	No	Yes	3	Yes
Faculty of Medicine	Female	18	Right Handed	1 Day/Week	8	Studying, Texting, Playing Games, Social Media, Watching Videos	2	100	Two hands	Sitting position	Yes	Neck	3	1	Throughout the day	4	No	I Did Not Use Any Agent	0 (Do not use analgesics)	No	No	Yes	2	Yes
Faculty of Medicine	Female	18	Right Handed	7 Day/Week	14	Studying, Texting, Social Media, Watching Videos	1	39	One hand	Supine position (Lying down)	Yes	Neck, Right Shoulder	1	2	At night	6	No	I Did Not Use Any Agent	0 (Do not use analgesics)	Yes, I've Visited the Emergency Department	No	No	5	Yes
Faculty of Medicine	Female	21	Left Handed	7 Day/Week	15	Studying, Texting, Social Media, Watching Videos	6	20	Two hands	Sitting position	Yes	Neck, Left Shoulder	4	2	Throughout the day	4	No	I Did Not Use Any Agent	0 (Do not use analgesics)	No	No	Yes	4	Yes
Faculty of Medicine	Female	18	Right Handed	3 Day/Week	8	Texting, Social Media		10	Two hands	Sitting position	Yes	Neck	3	1	In the morning	4	No	I Did Not Use Any Agent	0 (Do not use analgesics)	No	Yes	Yes	3	Yes
Faculty of Medicine	Female	18	Right Handed	7 Day/Week	23	Studying, Texting, Social Media	2	20	Two hands	Sitting position	Yes	Right Shoulder	2	1	At night	4	No	I Did Not Use Any Agent	0 (Do not use analgesics)	No	No	Yes	4	Yes
Faculty of Medicine	Female	18	Right Handed	1 Day/Week	24	Studying, Texting, Working, Social Media, Watching Videos	24	60	One hand	Sitting position	Yes	Neck	3	17	Throughout the day	3	No	I Did Not Use Any Agent	0 (Do not use analgesics)	No	Yes	Yes	3	Yes
Faculty of Medicine	Female	18	Right Handed	7 Day/Week	6	Social Media, Watching Videos			One hand	Sitting position	Yes	Neck	2	1	At night	4	No	I Did Not Use Any Agent	0 (Do not use analgesics)	No	No	No	3	No
Faculty of Pharmacy	Female	18	Right Handed	7 Day/Week	3	Studying, Social Media	1	3	One hand	Sitting position	Yes	Neck	1	1	In the morning	4	No	I Did Not Use Any Agent	0 (Do not use analgesics)	No	Yes	Yes	1	Yes
Faculty of Pharmacy	Female	21	Right Handed	7 Day/Week	5	Studying, Texting, Playing Games, Social Media, Watching Videos	2	50	One hand	Sitting position	Yes	Neck	1	1	At night	4	No	I Did Not Use Any Agent	0 (Do not use analgesics)	No	Yes	Yes	3	Yes
Faculty of Medicine	Female	20	Right Handed	7 Day/Week	23	Texting, Playing Games, Social Media, Watching Videos		100000	One hand	Sitting position	Yes	Neck, Right Shoulder, Left Shoulder	1	1	At night	1	No	I Did Not Use Any Agent	0 (Do not use analgesics)	No	No	Yes	1	No
Faculty of Dentistry	Male	18	Right Handed	2 Day/Week	8	Playing Games	7	6	Two hands	Walking position	Yes	Neck, Right Shoulder, Left Shoulder	3	8	Throughout the day	6	Yes	Nonsteroidal Anti-Inflammatory Drugs (ibuprofen, panadol naproxen, and Aspirin...etc), I Did Not Use Any Agent	3	Yes, I've Visited the Emergency Department	Yes	No	4	No
Faculty of Medicine	Male	19	Right Handed	7 Day/Week	10	Studying, Texting, Working, Playing Games, Social Media, Watching Videos	1	150	One hand	Sitting position	Yes	Neck	3	2	Throughout the day	1	No	I Did Not Use Any Agent	0 (Do not use analgesics)	No	No	Yes	1	Yes
Faculty of Pharmacy	Female	23	Right Handed	7 Day/Week	4	Studying, Texting, Social Media, Watching Videos	1	2	One hand	Sitting position	Yes	Neck	1	1	Throughout the day	1	No	I Did Not Use Any Agent	0 (Do not use analgesics)	No	No	Yes	1	Yes
Faculty of Medicine	Female	21	Right Handed	4 Day/Week	5	Studying, Texting, Social Media, Watching Videos	4	15	One hand	Sitting position	Yes	Neck, Right Shoulder	7	24	Throughout the day	5	No	I Did Not Use Any Agent	0 (Do not use analgesics)	No	No	Yes	4	No
Faculty of Dentistry	Male	20	Right Handed	7 Day/Week	6	Texting, Social Media			Two hands	Sitting position	Yes	Neck	3	2	In the morning	3	No	I Did Not Use Any Agent	0 (Do not use analgesics)	No	Yes	No	1	Yes
Faculty of Medicine	Female	19	Right Handed	1 Day/Week	12	Social Media	4	50	Two hands	Sitting position	Yes	Neck	3	2	At night	7	No	I Did Not Use Any Agent	0 (Do not use analgesics)	No	No	Yes	6	Yes
Faculty of Medicine	Female	20	Right Handed	7 Day/Week	5	Studying, Social Media	10		One hand	Standing position	Yes	Neck	1	1	At night	1	No	I Did Not Use Any Agent	0 (Do not use analgesics)	No	Yes	Yes	1	No
Faculty of Medicine	Female	21	Left Handed	1 Day/Week	12	Texting		100	One hand	Sitting position	Yes	Left Shoulder	1	1	At night	6	Yes	Nonsteroidal Anti-Inflammatory Drugs (ibuprofen, panadol naproxen, and Aspirin...etc)	1	No	No	Yes	5	No
Faculty of Pharmacy	Female	24	Right Handed	7 Day/Week	12	Studying, Working, Social Media, Watching Videos	4	50	One hand	Sitting position	Yes	Right Shoulder, Left Shoulder	3	1	At night	3	No	Nonsteroidal Anti-Inflammatory Drugs (ibuprofen, panadol naproxen, and Aspirin...etc), Alternatives to Analgesics: Rest	2	No	No	No	3	Yes
Faculty of Medicine	Female	20	Right Handed	6 Day/Week	3	Texting, Social Media		2	Two hands	Sitting position	Yes	Neck	1	1	At night	2	No	I Did Not Use Any Agent	0 (Do not use analgesics)	No	Yes	Yes	1	Yes
Faculty of Medicine	Female	18	Right Handed	7 Day/Week	10	Social Media	4	20	Two hands	Sitting position	Yes	Neck	2	4	At night	1	No	I Did Not Use Any Agent	0 (Do not use analgesics)	No	No	Yes	1	No
Faculty of Medicine	Female	22	Right Handed	7 Day/Week	2.3	Studying, Texting, Working, Social Media, Watching Videos	1	10	One hand	Sitting position	Yes	Neck	2	3	At night	3	Yes	Alternatives to Analgesics: Heat, Alternatives to Analgesics: Rest	1	No	No	No	3	Yes
Faculty of Medicine	Female	22	Right Handed	7 Day/Week	7	Studying, Texting, Social Media, Watching Videos	1	150	Two hands	Sitting position	Yes	Neck, Right Shoulder, Left Shoulder	7	12	In the morning	7	No	I Did Not Use Any Agent	0 (Do not use analgesics)	Yes, I've visited the Clinic	No	No	8	Yes
Faculty of Medicine	Male	23	Right Handed	7 Day/Week	1	Texting, Social Media, Watching Videos		2	One hand	Sitting position	Yes	Neck	1	1	At night	3	No	I Did Not Use Any Agent	0 (Do not use analgesics)	No	No	No	3	No
Faculty of Pharmacy	Female	22	Right Handed	7 Day/Week	3	Studying, Social Media, Watching Videos	2		Two hands	Sitting position	Yes	Left Shoulder	2	1	Throughout the day	3	No	Alternatives to Analgesics: Massage, Alternatives to Analgesics: Rest	0 (Do not use analgesics)	No	No	Yes	1	No
Faculty of Pharmacy	Female	23	Right Handed	1 Day/Week	4	Studying, Texting	3	30	Two hands	Standing position	Yes	Neck, Right Shoulder	3	2	Throughout the day	3	No	I Did Not Use Any Agent	0 (Do not use analgesics)	No	No	Yes	2	Yes
Faculty of Pharmacy	Male	30	Right Handed	7 Day/Week	3	Texting, Social Media, Watching Videos		5	One hand	Sitting position	Yes	Neck	2	1	Throughout the day	1	No	Nonsteroidal Anti-Inflammatory Drugs (ibuprofen, panadol naproxen, and Aspirin...etc)	0 (Do not use analgesics)	No	Yes	Yes	1	Yes
Faculty of Medicine	Female	22	Left Handed	7 Day/Week	3	Studying, Playing Games, Social Media	2	2	Two hands	Sitting position	Yes	Neck	2	1	In the Afternoon	3	No	I Did Not Use Any Agent	0 (Do not use analgesics)	No	No	Yes	3	No
Faculty of Pharmacy	Female	25	Right Handed	4 Day/Week	9	Texting, Working, Social Media, Watching Videos		1	One hand	Sitting position	Yes	Neck	3	7	Throughout the day	6	Yes	Nonsteroidal Anti-Inflammatory Drugs (ibuprofen, panadol naproxen, and Aspirin...etc), Alternatives to Analgesics: Heat	1	No	No	No	6	Yes
Faculty of Dentistry	Female	17	Right Handed	7 Day/Week	4	Social Media			One hand	Standing position	Yes	Neck, Right Shoulder	3	3	Throughout the day	6	No	Corticosteroids	0 (Do not use analgesics)	No	Yes	No	6	No
Faculty of Medicine	Female	23	Right Handed	7 Day/Week	3	Texting, Social Media		70	One hand	Sitting position	Yes	Neck, Left Shoulder	5	2	In the Afternoon	2	No	I Did Not Use Any Agent	0 (Do not use analgesics)	No	No	No	2	Yes
Faculty of Medicine	Female	19	Left Handed	7 Day/Week	8	Studying, Texting, Social Media, Watching Videos	3		One hand	Sitting position	Yes	Neck, Right Shoulder, Left Shoulder	1	1	In the Afternoon	2	No	I Did Not Use Any Agent	0 (Do not use analgesics)	No	No	Yes	2	Yes
Faculty of Medicine	Female	24	Left Handed	6 Day/Week	2	Texting, Social Media, Watching Videos		15	One hand	Standing position	Yes	Left Shoulder	7	2	Throughout the day	3	No	I Did Not Use Any Agent	0 (Do not use analgesics)	Yes, I've visited the Clinic	No	No	3	No
Faculty of Medicine	Female	18	Right Handed	1 Day/Week	5	Texting, Social Media, Watching Videos		100	One hand	Supine position (Lying down)	Yes	Neck	1	2	At night	3	No	I Did Not Use Any Agent	0 (Do not use analgesics)	No	Yes	Yes	2	Yes
Faculty of Medicine	Female	22	Right Handed	7 Day/Week	10	Texting, Working, Playing Games, Social Media, Watching Videos		20	One hand	Sitting position	Yes	Neck	7	1	In the Afternoon	6	No	I Did Not Use Any Agent	0 (Do not use analgesics)	No	No	No	6	Yes
Faculty of Medicine	Female	24	Right Handed	7 Day/Week	6	Texting, Working, Social Media, Watching Videos			One hand	Sitting position	Yes	Right Shoulder	1	1	At night	1	No	Alternatives to Analgesics: Massage	1	No	No	Yes	1	Yes
Faculty of Medicine	Female	24	Right Handed	7 Day/Week	12	Studying, Working, Social Media, Watching Videos	2		One hand	Supine position (Lying down)	Yes	Right Shoulder	1	1	At night	1	No	I Did Not Use Any Agent	0 (Do not use analgesics)	No	No	Yes	1	No
Faculty of Medicine	Female	18	Right Handed	7 Day/Week	3	Studying, Social Media	2	1	Two hands	Sitting position	Yes	Neck	1	1	In the morning	1	No	I Did Not Use Any Agent	0 (Do not use analgesics)	No	No	Yes	1	No
Faculty of Medicine	Female	22	Right Handed	7 Day/Week	7	Studying, Texting, Social Media, Watching Videos	1	150	Two hands	Sitting position	Yes	Neck, Right Shoulder, Left Shoulder	7	12	In the morning	7	No	I Did Not Use Any Agent	0 (Do not use analgesics)	Yes, I've visited the Clinic	No	No	8	Yes
Faculty of Medicine	Female	24	Right Handed	7 Day/Week	6	Studying, Texting, Social Media	2	60	One hand	Sitting position	Yes	Neck	1	2	In the morning	2	No	Alternatives to Analgesics: Rest, I Did Not Use Any Agent	0 (Do not use analgesics)	No	Yes	Yes	1	Yes
Faculty of Medicine	Female	22	Right Handed	7 Day/Week	3	Studying, Texting, Playing Games, Social Media	1	15	Two hands	Sitting position	Yes	Neck	1	1	At night	3	No	I Did Not Use Any Agent	0 (Do not use analgesics)	No	Yes	Yes	1	Yes
Faculty of Medicine	Female	19	Right Handed	7 Day/Week	14	Studying, Texting, Social Media, Watching Videos	2	100	One hand	Supine position (Lying down)	Yes	Neck, Right Shoulder	2	5	At night	3	No	I Did Not Use Any Agent	0 (Do not use analgesics)	No	No	No	3	Yes
Faculty of Pharmacy	Female	23	Right Handed	7 Day/Week	8	Studying, Texting, Working, Social Media, Watching Videos	1	100	Two hands	Sitting position	Yes	Neck	4	1	In the Afternoon	3	Yes	Nonsteroidal Anti-Inflammatory Drugs (ibuprofen, panadol naproxen, and Aspirin...etc), Alternatives to Analgesics: Massage, Alternatives to Analgesics: Rest	1	No	No	No	3	Yes
Faculty of Medicine	Male	22	Right Handed	7 Day/Week	5	Studying, Texting, Social Media, Watching Videos	1	3	Two hands	Supine position (Lying down)	Yes	Neck	1	1	At night	2	No	No	0 (Do not use analgesics)	No	No	Yes	1	Yes
Faculty of Medicine	Female	22	Right Handed	7 Day/Week	3	Studying, Texting, Social Media	1	10	One hand	Sitting position	Yes	Neck	1	1	Throughout the day	1	No	Alternatives to Analgesics: Rest	0 (Do not use analgesics)	No	No	Yes	1	Yes
Faculty of Medicine	Female	19	Right Handed	7 Day/Week	6	Texting	9	30	Two hands	Sitting position	Yes	Left Shoulder	1	1	Throughout the day	3	No	I Did Not Use Any Agent	0 (Do not use analgesics)	No	Yes	No	2	Yes
Faculty of Rehabilitation	Male	23	Right Handed	7 Day/Week	3	Studying, Texting, Working, Playing Games, Social Media, Watching Videos	1	20	Two hands	Sitting position	Yes	Neck	2	3	Throughout the day	3	No	I Did Not Use Any Agent	0 (Do not use analgesics)	No	No	No	3	No
Faculty of Medicine	Male	23	Left Handed	7 Day/Week	2	Studying, Texting, Social Media	1	10	One hand	Sitting position	Yes	Neck	2	4	In the Afternoon	5	No	I Did Not Use Any Agent	0 (Do not use analgesics)	No	No	Yes	5	Yes
Faculty of Medicine	Female	26	Right Handed	7 Day/Week	5	Social Media		100	Two hands	Sitting position	Yes	Neck	7	12	Throughout the day	5	Yes	Neurological Analgesia (gabapentin, amitriptyline..etc)	3	Yes, I've visited the Clinic	Yes	Yes	5	Yes
Faculty of Pharmacy	Female	23	Right Handed	7 Day/Week	4	Studying, Texting, Working, Playing Games, Social Media, Watching Videos	2	1	One hand	Sitting position	Yes	Neck	3	8	Throughout the day	7	No	Alternatives to Analgesics: Heat, Alternatives to Analgesics: Massage, Alternatives to Analgesics: Rest, Alternatives to Analgesics: Relaxation techniques	0 (Do not use analgesics)	No	No	Yes	6	No
Faculty of Medicine	Female	22	Right Handed	7 Day/Week	18	Studying, Texting, Working, Social Media, Watching Videos	3	100	One hand	Sitting position	Yes	Neck	1	1	Throughout the day	3	No	I Did Not Use Any Agent	0 (Do not use analgesics)	No	No	No	3	No
Faculty of Medicine	Female	18	Right Handed	7 Day/Week	4	Texting, Playing Games, Social Media, Watching Videos		1	One hand	Sitting position	Yes	Neck, Right Shoulder	2	6	At night	7	No	I Did Not Use Any Agent	0 (Do not use analgesics)	No	No	No	7	Yes
Faculty of Dentistry	Male	19	Right Handed	7 Day/Week	5	Social Media	1	1	One hand	Supine position (Lying down)	Yes	Neck	1	1	In the morning	2	No	I Did Not Use Any Agent	0 (Do not use analgesics)	No	No	No	1	Yes
Faculty of Medicine	Female	19	Right Handed	7 Day/Week	16	Studying, Texting, Social Media, Watching Videos	7	30	One hand	Sitting position	Yes	Neck, Right Shoulder	2	1	At night	5	No	Nonsteroidal Anti-Inflammatory Drugs (ibuprofen, panadol naproxen, and Aspirin...etc)	0 (Do not use analgesics)	No	Yes	Yes	3	Yes
Faculty of Medicine	Male	20	Right Handed	7 Day/Week	5	Studying, Texting, Social Media, Watching Videos	1	100	One hand	Sitting position	Yes	Neck, Right Shoulder	2	2	At night	3	No	I Did Not Use Any Agent	0 (Do not use analgesics)	No	No	No	3	No
Faculty of Medicine	Female	23	Right Handed	7 Day/Week	4	Studying, Texting, Social Media, Watching Videos	3	1	Two hands	Sitting position	Yes	Neck	4	6	In the morning	7	Yes	Nonsteroidal Anti-Inflammatory Drugs (ibuprofen, panadol naproxen, and Aspirin...etc), Alternatives to Analgesics: Heat, Alternatives to Analgesics: Massage, Alternatives to Analgesics: Rest, Alternatives to Analgesics: Relaxation techniques	3	No	No	Yes	5	No
Faculty of Pharmacy	Female	22	Right Handed	7 Day/Week	6	Studying, Texting, Social Media, Watching Videos	4	200	Two hands	Supine position (Lying down)	Yes	Neck, Right Shoulder, Left Shoulder	2	1	In the morning	3	No	I Did Not Use Any Agent	0 (Do not use analgesics)	No	No	Yes	1	Yes
Faculty of Medicine	Female	19	Right Handed	7 Day/Week	6	Social Media			Two hands	Sitting position	Yes	Neck	4	1	In the Afternoon	3	Yes	Nonsteroidal Anti-Inflammatory Drugs (ibuprofen, panadol naproxen, and Aspirin...etc)	1	No	No	Yes	2	Yes
Faculty of Pharmacy	Female	23	Right Handed	1 Day/Week	4	Studying, Texting	3	30	Two hands	Standing position	Yes	Neck, Right Shoulder	3	2	Throughout the day	3	No	I Did Not Use Any Agent	0 (Do not use analgesics)	No	No	Yes	2	Yes
Faculty of Rehabilitation	Female	18	Right Handed	7 Day/Week	16	Studying, Texting, Working, Playing Games, Social Media, Watching Videos	1	400	Two hands	Sitting position	Yes	Neck	3	5	Throughout the day	3	Yes	Nonsteroidal Anti-Inflammatory Drugs (ibuprofen, panadol naproxen, and Aspirin...etc), Alternatives to Analgesics: Heat, Alternatives to Analgesics: Ice, Alternatives to Analgesics: Massage, Alternatives to Analgesics: Rest, Alternatives to Analgesics: Relaxation techniques	1	No	No	No	3	No
Faculty of Medicine	Male	18	Right Handed	4 Day/Week	4	Studying, Social Media, Watching Videos	1		One hand	Sitting position	Yes	Neck	2	1	At night	1	No	Alternatives to Analgesics: Rest	0 (Do not use analgesics)	No	No	No	1	Yes
Faculty of Medicine	Male	23	Right Handed	7 Day/Week	2	Texting, Working		250	Two hands	Sitting position	Yes	Neck	2	1	At night	3	No	I Did Not Use Any Agent	0 (Do not use analgesics)	No	No	No	3	Yes
Faculty of Dentistry	Female	19	Right Handed	7 Day/Week	9	Studying, Texting, Social Media	2		Two hands	Sitting position	Yes	Neck	2	1	At night	6	No	I Did Not Use Any Agent	0 (Do not use analgesics)	No	Yes	Yes	2	Yes
Faculty of Medicine	Female	20	Right Handed	7 Day/Week	5	Studying, Texting, Social Media	1	1000	One hand	Sitting position	Yes	Neck	7	3	At night	3	No	I Did Not Use Any Agent	0 (Do not use analgesics)	No	No	No	3	Yes
Faculty of Medicine	Female	20	Right Handed	1 Day/Week	6	Texting, Social Media, Watching Videos		5	Two hands	Sitting position	Yes	Neck	1	1	In the Afternoon	1	No	I Did Not Use Any Agent	0 (Do not use analgesics)	No	No	Yes	1	No
Faculty of Medicine	Male	20	Right Handed	7 Day/Week	17	Studying, Texting, Social Media, Watching Videos	4	7	Two hands	Supine position (Lying down)	Yes	Neck, Left Shoulder	7	20	At night	6	No	I Did Not Use Any Agent	0 (Do not use analgesics)	No	No	Yes	7	No
Faculty of Dentistry	Female	21	Right Handed	7 Day/Week	24	Social Media	6	100000	Two hands	Supine position (Lying down)	Yes	Right Shoulder	1	1	Throughout the day	4	Yes	Nonsteroidal Anti-Inflammatory Drugs (ibuprofen, panadol naproxen, and Aspirin...etc)	1	Yes, I've visited the Clinic	No	Yes	4	No
Faculty of Medicine	Female	20	Right Handed	7 Day/Week	3	Texting, Working, Social Media		30	Two hands	Sitting position	Yes	Neck	1	1	Throughout the day	6	No	I Did Not Use Any Agent	0 (Do not use analgesics)	No	No	Yes	6	Yes
Faculty of Pharmacy	Female	22	Left Handed	3 Day/Week	3	Studying, Texting, Social Media, Watching Videos	5	3	One hand	Sitting position	Yes	Left Shoulder	3	2	At night	2	Yes	Alternatives to Analgesics: Heat, Alternatives to Analgesics: Rest	2	Yes, I've visited the Clinic	No	No	2	No
Faculty of Medicine	Female	23	Right Handed	1 Day/Week	4	Social Media		5	One hand	Sitting position	Yes	Neck	6	1	In the Afternoon	1	No	I Did Not Use Any Agent	0 (Do not use analgesics)	No	No	Yes	1	Yes
Faculty of Pharmacy	Female	19	Right Handed	1 Day/Week	12	Studying, Texting, Social Media	5	8	One hand	Supine position (Lying down)	Yes	Neck	1	1	At night	2	No	I Did Not Use Any Agent	0 (Do not use analgesics)	No	No	No	1	Yes
Faculty of Medicine	Male	22	Right Handed	7 Day/Week	5	Studying, Texting, Playing Games, Social Media, Watching Videos	1	1	One hand	Sitting position	Yes	Right Shoulder	1	1	Throughout the day	1	No	I Did Not Use Any Agent	0 (Do not use analgesics)	No	No	No	1	No
Faculty of Medicine	Male	20	Right Handed	7 Day/Week	8	Studying, Playing Games, Social Media, Watching Videos	1		One hand	Supine position (Lying down)	Yes	Right Shoulder, Left Shoulder	2	1	In the morning	2	No	I Did Not Use Any Agent	0 (Do not use analgesics)	No	No	No	2	No
Faculty of Medicine	Male	22	Right Handed	7 Day/Week	3	Studying, Texting, Social Media	1	5	One hand	Sitting position	Yes	Neck	1	1	Throughout the day	2	No	I Did Not Use Any Agent	0 (Do not use analgesics)	No	Yes	Yes	1	No
Faculty of Medicine	Female	20	Right Handed	7 Day/Week	7	Studying, Texting, Social Media, Watching Videos	1	100	One hand	Sitting position	Yes	Neck	1	1	Throughout the day	1	No	I Did Not Use Any Agent	0 (Do not use analgesics)	No	No	Yes	1	Yes
Faculty of Pharmacy	Female	21	Right Handed	7 Day/Week	10	Texting, Playing Games, Social Media		40	One hand	Sitting position	Yes	Neck, Right Shoulder	4	3	In the Afternoon	2	No	I Did Not Use Any Agent	0 (Do not use analgesics)	No	Yes	Yes	2	Yes
Faculty of Medicine	Male	19	Right Handed	5 Day/Week	6	Playing Games, Social Media			Two hands	Sitting position	Yes	Left Shoulder	1	1	At night	1	No	I Did Not Use Any Agent	0 (Do not use analgesics)	No	No	Yes	1	No
Faculty of Medicine	Male	22	Right Handed	2 Day/Week	2	Studying, Texting, Playing Games, Watching Videos	1	20	One hand	Supine position (Lying down)	Yes	Neck, Left Shoulder	5	1	Throughout the day	4	Yes	Nonsteroidal Anti-Inflammatory Drugs (ibuprofen, panadol naproxen, and Aspirin...etc)	1	No	Yes	Yes	3	Yes
Faculty of Medicine	Female	19	Right Handed	1 Day/Week	2	Social Media			Two hands	Sitting position	Yes	Neck	1	2	At night	4	Yes	Alternatives to Analgesics: Massage, Alternatives to Analgesics: Rest	1	No	Yes	No	1	Yes
Faculty of Medicine	Male	19	Left Handed	7 Day/Week	10	Studying, Texting, Playing Games, Social Media, Watching Videos	1	4	One hand	Sitting position	Yes	Right Shoulder	1	1	At night	3	No	I Did Not Use Any Agent	0 (Do not use analgesics)	No	No	Yes	3	No
Faculty of Medicine	Female	21	Left Handed	7 Day/Week	10	Texting, Social Media		4	Two hands	Sitting position	Yes	Neck	2	3	At night	3	No	I Did Not Use Any Agent	0 (Do not use analgesics)	No	No	Yes	3	No
Faculty of Medicine	Male	21	Right Handed	7 Day/Week	1	Studying, Texting, Working, Playing Games, Social Media, Watching Videos	1	2	Two hands	Walking position	Yes	Neck	1	1	In the Afternoon	2	No	I Did Not Use Any Agent	0 (Do not use analgesics)	No	No	No	2	No
Faculty of Medicine	Male	24	Right Handed	7 Day/Week	5	Studying, Texting, Social Media, Watching Videos	1.5	2	Two hands	Sitting position	Yes	Neck	2	2	At night	3	No	Nonsteroidal Anti-Inflammatory Drugs (ibuprofen, panadol naproxen, and Aspirin...etc)	0 (Do not use analgesics)	No	No	Yes	3	No
Faculty of Medicine	Female	24	Right Handed	7 Day/Week	6	Studying, Texting, Playing Games, Social Media, Watching Videos	1	4	One hand	Sitting position	Yes	Right Shoulder, Left Shoulder	6	3	Throughout the day	5	Yes	Nonsteroidal Anti-Inflammatory Drugs (ibuprofen, panadol naproxen, and Aspirin...etc), Neurological Analgesia (gabapentin, amitriptyline..etc), Alternatives to Analgesics: Heat, Alternatives to Analgesics: Massage	1	Yes, I've visited the Clinic	No	Yes	5	No
Faculty of Medicine	Female	18	Right Handed	1 Day/Week	8	Studying, Texting, Playing Games, Social Media, Watching Videos	2	100	Two hands	Sitting position	Yes	Neck	3	1	Throughout the day	4	No	I Did Not Use Any Agent	0 (Do not use analgesics)	No	No	Yes	2	Yes
Faculty of Medicine	Female	22	Left Handed	7 Day/Week	2	Studying, Texting, Working, Social Media, Watching Videos	1	2	Two hands	Sitting position	Yes	Neck	1	1	In the Afternoon	3	No	I Did Not Use Any Agent	0 (Do not use analgesics)	No	No	Yes	1	Yes
Faculty of Medicine	Female	18	Right Handed	7 Day/Week	5	Social Media			Two hands	Supine position (Lying down)	Yes	Neck	1	1	At night	3	No	I Did Not Use Any Agent	0 (Do not use analgesics)	No	Yes	Yes	1	Yes
Faculty of Medicine	Female	18	Right Handed	7 Day/Week	4	Texting, Social Media, Watching Videos		5	Two hands	Standing position	Yes	Neck	2	1	In the Afternoon	2	No	I Did Not Use Any Agent	0 (Do not use analgesics)	No	Yes	Yes	1	Yes
Faculty of Medicine	Male	19	Left Handed	7 Day/Week	3	Studying, Texting, Playing Games, Social Media, Watching Videos	1	200	Two hands	Sitting position	Yes	Neck	1	1	At night	4	No	I Did Not Use Any Agent	0 (Do not use analgesics)	No	No	Yes	3	No
Faculty of Medicine	Female	19	Right Handed	1 Day/Week	4	Studying, Texting, Social Media, Watching Videos	1	100	Two hands	Sitting position	Yes	Neck, Right Shoulder	2	2	Throughout the day	4	No	I Did Not Use Any Agent	0 (Do not use analgesics)	No	Yes	Yes	4	Yes
Faculty of Medicine	Male	18	Right Handed	7 Day/Week	5	Studying, Texting, Social Media, Watching Videos	1	50	One hand	Supine position (Lying down)	Yes	Neck	1	1	Throughout the day	3	No	I Did Not Use Any Agent	0 (Do not use analgesics)	No	No	Yes	2	Yes
Faculty of Medicine	Male	19	Right Handed	7 Day/Week	6	Texting, Working, Social Media, Watching Videos		2500	Two hands	Sitting position	Yes	Neck	1	1	In the morning	2	No	I Did Not Use Any Agent	0 (Do not use analgesics)	No	No	No	2	No
Faculty of Medicine	Female	19	Right Handed	7 Day/Week	4	Studying, Texting, Social Media, Watching Videos	2	100	Two hands	Sitting position	Yes	Right Shoulder	1	1	Throughout the day	2	No	I Did Not Use Any Agent	0 (Do not use analgesics)	No	Yes	Yes	1	Yes
Faculty of Medicine	Female	23	Right Handed	7 Day/Week	3	Studying, Social Media	2		Two hands	Supine position (Lying down)	Yes	Right Shoulder, Left Shoulder	3	2	At night	4	No	I Did Not Use Any Agent	0 (Do not use analgesics)	No	Yes	Yes	2	Yes
Faculty of Medicine	Female	28	Right Handed	7 Day/Week	4	Texting, Social Media, Watching Videos		5	One hand	Sitting position	Yes	Right Shoulder, Left Shoulder	2	3	Throughout the day	3	No	I Did Not Use Any Agent	0 (Do not use analgesics)	No	No	Yes	3	Yes
Faculty of Medicine	Male	19	Right Handed	7 Day/Week	2	Studying, Texting, Social Media, Watching Videos	1	25	One hand	Sitting position	Yes	Neck	7	1	At night	3	No	I Did Not Use Any Agent	0 (Do not use analgesics)	Yes, I've visited the Clinic	No	No	3	No
Faculty of Medicine	Male	18	Right Handed	7 Day/Week	2	Studying, Playing Games, Social Media, Watching Videos	2		One hand	Sitting position	Yes	Neck	1	1	Throughout the day	1	No	I Did Not Use Any Agent	0 (Do not use analgesics)	No	No	Yes	1	Yes
Faculty of Pharmacy	Female	19	Right Handed	7 Day/Week	7	Studying, Texting, Social Media, Watching Videos	1	30	Two hands	Supine position (Lying down)	Yes	Neck	3	2	In the morning	6	Yes	Nonsteroidal Anti-Inflammatory Drugs (ibuprofen, panadol naproxen, and Aspirin...etc)	3	No	Yes	Yes	3	Yes
Faculty of Medicine	Female	22	Right Handed	7 Day/Week	8	Studying, Social Media, Watching Videos	3		One hand	Sitting position	Yes	Neck, Left Shoulder	7	3	At night	7	No	Alternatives to Analgesics: Heat, Alternatives to Analgesics: Ice, Alternatives to Analgesics: Rest	1	No	No	No	1	Yes
Faculty of Medicine	Male	25	Right Handed	7 Day/Week	7	Studying, Texting, Working, Playing Games, Social Media, Watching Videos	3	3	One hand	Supine position (Lying down)	Yes	Neck	1	1	At night	3	No	I Did Not Use Any Agent	0 (Do not use analgesics)	No	No	No	3	No
Faculty of Pharmacy	Female	21	Right Handed	7 Day/Week	12	Studying, Texting, Playing Games, Social Media, Watching Videos	3	100	Two hands	Sitting position	Yes	Neck, Right Shoulder, Left Shoulder	7	7	Throughout the day	7	No	I Did Not Use Any Agent	0 (Do not use analgesics)	No	No	No	7	Yes
Faculty of Medicine	Female	19	Right Handed	7 Day/Week	3	Studying, Social Media, Watching Videos	1	40	Two hands	Sitting position	Yes	Neck	3	1	In the Afternoon	3	No	I Did Not Use Any Agent	0 (Do not use analgesics)	No	No	Yes	2	No
Faculty of Medicine	Male	20	Right Handed	7 Day/Week	6	Studying, Texting, Working, Playing Games, Social Media, Watching Videos	1	1000	One hand	Sitting position	Yes	Neck	1	3	In the morning	4	No	I Did Not Use Any Agent	0 (Do not use analgesics)	No	No	No	3	Yes
Faculty of Medicine	Male	24	Right Handed	7 Day/Week	14	Studying, Texting, Working, Social Media, Watching Videos	1	30	One hand	Standing position	Yes	Neck	5	2	In the Afternoon	5	No	I Did Not Use Any Agent	0 (Do not use analgesics)	No	No	No	5	Yes
Faculty of Medicine	Female	23	Right Handed	7 Day/Week	7	Studying, Texting, Social Media, Watching Videos	1	50	One hand	Supine position (Lying down)	Yes	Neck	1	1	At night	2	No	I Did Not Use Any Agent	0 (Do not use analgesics)	No	No	Yes	1	Yes
Faculty of Medicine	Female	22	Right Handed	7 Day/Week	4	Studying, Texting, Working, Social Media, Watching Videos	1	200	One hand	Sitting position	Yes	Neck, Right Shoulder	4	3	In the morning	7	Yes	Nonsteroidal Anti-Inflammatory Drugs (ibuprofen, panadol naproxen, and Aspirin...etc), Alternatives to Analgesics: Ice, Alternatives to Analgesics: Massage, Alternatives to Analgesics: Rest	1	No	No	Yes	5	Yes
Faculty of Medicine	Female	24	Right Handed	7 Day/Week	3	Studying, Texting, Social Media, Watching Videos	1	20	Two hands	Sitting position	Yes	Neck	1	1	At night	1	No	Alternatives to Analgesics: Rest	0 (Do not use analgesics)	No	No	Yes	1	Yes
Faculty of Medicine	Female	23	Right Handed	7 Day/Week	5	Studying, Social Media	1		One hand	Sitting position	Yes	Neck	2	2	In the Afternoon	5	No	I Did Not Use Any Agent	0 (Do not use analgesics)	No	No	Yes	3	Yes
Faculty of Medicine	Male	24	Right Handed	7 Day/Week	2	Studying, Texting, Social Media, Watching Videos		40	One hand	Sitting position	Yes	Neck	3	10	Throughout the day	2	No	I Did Not Use Any Agent	0 (Do not use analgesics)	No	Yes	No	2	Yes
Faculty of Medicine	Female	19	Right Handed	4 Day/Week	6	Texting, Social Media		100	One hand	Sitting position	Yes	Neck	3	1	Throughout the day	6	No	I Did Not Use Any Agent	0 (Do not use analgesics)	No	Yes	Yes	7	No
Faculty of Medicine	Female	24	Right Handed	7 Day/Week	4	Studying, Texting, Social Media, Watching Videos	1	50	One hand	Sitting position	Yes	Neck, Right Shoulder, Left Shoulder	2	3	In the Afternoon	3	No	I Did Not Use Any Agent	0 (Do not use analgesics)	No	No	Yes	2	Yes
Faculty of Medicine	Female	23	Right Handed	7 Day/Week	8	Studying, Texting, Social Media, Watching Videos	2	40	Two hands	Sitting position	Yes	Neck	1	1	In the Afternoon	3	No	I Did Not Use Any Agent	0 (Do not use analgesics)	No	Yes	Yes	1	Yes
Faculty of Medicine	Female	24	Right Handed	7 Day/Week	2	Studying, Texting, Social Media, Watching Videos	1	5	One hand	Sitting position	Yes	Neck, Right Shoulder, Left Shoulder	7	2	At night	5	No	Alternatives to Analgesics: Rest	0 (Do not use analgesics)	No	No	Yes	5	Yes
Faculty of Medicine	Female	19	Right Handed	7 Day/Week	10	Texting, Playing Games, Social Media, Watching Videos		20	Two hands	Sitting position	Yes	Neck, Right Shoulder	4	2	At night	1	No	I Did Not Use Any Agent	0 (Do not use analgesics)	No	No	Yes	1	Yes
Faculty of Pharmacy	Female	22	Left Handed	5 Day/Week	3	Studying, Social Media, Watching Videos	1		One hand	Sitting position	Yes	Neck	1	1	In the Afternoon	3	No	I Did Not Use Any Agent	0 (Do not use analgesics)	No	Yes	Yes	2	Yes
Faculty of Medicine	Female	23	Right Handed	7 Day/Week	3	Studying, Texting, Social Media, Watching Videos	1	20	One hand	Sitting position	Yes	Right Shoulder, Left Shoulder	2	1	In the Afternoon	4	Yes	Alternatives to Analgesics: Rest, Alternatives to Analgesics: Relaxation techniques	0 (Do not use analgesics)	No	Yes	Yes	4	Yes
Faculty of Dentistry	Female	21	Right Handed	7 Day/Week	24	Social Media	6	100000	Two hands	Supine position (Lying down)	Yes	Right Shoulder	1	1	Throughout the day	4	Yes	Nonsteroidal Anti-Inflammatory Drugs (ibuprofen, panadol naproxen, and Aspirin...etc)	1	Yes, I've visited the Clinic	No	Yes	4	No
Faculty of Pharmacy	Female	21	Right Handed	7 Day/Week	8	Studying, Texting, Playing Games, Social Media	1	100	Two hands	Sitting position	Yes	Neck	3	1	At night	7	Yes	Nonsteroidal Anti-Inflammatory Drugs (ibuprofen, panadol naproxen, and Aspirin...etc), Alternatives to Analgesics: Rest	3	Yes, I've visited the Clinic	No	Yes	6	Yes
Faculty of Pharmacy	Female	21	Right Handed	7 Day/Week	8	Studying, Texting, Playing Games, Social Media	1	100	Two hands	Sitting position	Yes	Neck	3	1	At night	7	Yes	Nonsteroidal Anti-Inflammatory Drugs (ibuprofen, panadol naproxen, and Aspirin...etc), Alternatives to Analgesics: Rest	3	Yes, I've visited the Clinic	No	Yes	6	Yes
Faculty of Medicine	Female	18	Right Handed	7 Day/Week	12	Studying, Texting, Working, Playing Games, Social Media, Watching Videos	1	120	Two hands	Sitting position	Yes	Left Shoulder	2	1	In the morning	4	No	Nonsteroidal Anti-Inflammatory Drugs (ibuprofen, panadol naproxen, and Aspirin...etc)	0 (Do not use analgesics)	No	Yes	Yes	1	No
Faculty of Medicine	Female	23	Right Handed	7 Day/Week	6	Texting, Social Media, Watching Videos		200	One hand	Sitting position	Yes	Neck	7	2	At night	4	No	I Did Not Use Any Agent	0 (Do not use analgesics)	No	No	No	1	Yes
Faculty of Medicine	Male	19	Right Handed	7 Day/Week	4	Texting, Social Media		30	One hand	Supine position (Lying down)	Yes	Neck, Right Shoulder	5	3	At night	5	Yes	Nonsteroidal Anti-Inflammatory Drugs (ibuprofen, panadol naproxen, and Aspirin...etc), Alternatives to Analgesics: Massage, Alternatives to Analgesics: Rest	5	Yes, I've visited the Clinic	No	Yes	3	Yes
Faculty of Medicine	Female	21	Right Handed	7 Day/Week	3	Studying, Texting, Social Media, Watching Videos	1	5	Two hands	Sitting position	Yes	Neck, Right Shoulder, Left Shoulder	5	1	In the morning	6	No	Alternatives to Analgesics: Rest, I Did Not Use Any Agent	0 (Do not use analgesics)	No	No	Yes	3	Yes
Faculty of Medicine	Female	20	Right Handed	7 Day/Week	12	Studying, Texting, Social Media, Watching Videos	3	+100	Two hands	Sitting position	Yes	Neck, Right Shoulder, Left Shoulder	4	3	Throughout the day	5	No	I Did Not Use Any Agent	0 (Do not use analgesics)	No	Yes	Yes	2	Yes
Faculty of Medicine	Female	23	Right Handed	7 Day/Week	8	Studying, Texting, Working, Playing Games, Social Media, Watching Videos	1	50	Two hands	Sitting position	Yes	Neck	1	6	Throughout the day	6	Yes	Nonsteroidal Anti-Inflammatory Drugs (ibuprofen, panadol naproxen, and Aspirin...etc)	1	No	No	Yes	4	Yes
Faculty of Medicine	Female	23	Right Handed	7 Day/Week	4	Studying, Texting, Working, Playing Games, Social Media, Watching Videos	1	100	Two hands	Sitting position	Yes	Left Shoulder	1	2	At night	2	No	I Did Not Use Any Agent	0 (Do not use analgesics)	No	No	Yes	2	No
Faculty of Medicine	Female	22	Right Handed	7 Day/Week	8	Studying, Texting, Playing Games, Social Media, Watching Videos	1	8	One hand	Sitting position	Yes	Neck	3	2	Throughout the day	3	No	I Did Not Use Any Agent	0 (Do not use analgesics)	No	Yes	Yes	2	Yes
Faculty of Medicine	Male	22	Left Handed	7 Day/Week	5	Studying, Social Media, Watching Videos	1		One hand	Supine position (Lying down)	Yes	Left Shoulder	1	1	At night	1	No	I Did Not Use Any Agent	0 (Do not use analgesics)	No	No	Yes	1	No
Faculty of Medicine	Female	23	Right Handed	7 Day/Week	7	Studying, Texting, Playing Games, Social Media, Watching Videos	2	10	One hand	Sitting position	Yes	Neck, Right Shoulder	7	16	Throughout the day	5	Yes	Alternatives to Analgesics: Heat, Alternatives to Analgesics: Massage, Alternatives to Analgesics: Rest	4	No	No	Yes	5	Yes
Faculty of Medicine	Female	23	Right Handed	7 Day/Week	9	Studying, Texting, Working, Playing Games, Social Media, Watching Videos	2	70	Two hands	Sitting position	Yes	Neck	1	1	In the morning	4	Yes	Nonsteroidal Anti-Inflammatory Drugs (ibuprofen, panadol naproxen, and Aspirin...etc)	1	No	No	No	1	Yes
Faculty of Medicine	Female	23	Right Handed	7 Day/Week	2	Studying, Texting, Social Media, Watching Videos	1	6	One hand	Sitting position	Yes	Left Shoulder	1	1	In the morning	1	No	I Did Not Use Any Agent	0 (Do not use analgesics)	No	No	No	1	No
Faculty of Pharmacy	Female	22	Right Handed	7 Day/Week	13	Studying, Texting, Working, Playing Games, Social Media, Watching Videos	3	10	Two hands	Supine position (Lying down)	Yes	Neck	4	1	At night	3	No	I Did Not Use Any Agent	0 (Do not use analgesics)	No	No	No	1	Yes
Faculty of Medicine	Female	23	Right Handed	7 Day/Week	5	Studying, Texting, Working, Playing Games, Social Media, Watching Videos	2	3	Two hands	Sitting position	Yes	Right Shoulder	1	1	In the Afternoon	5	No	I Did Not Use Any Agent	0 (Do not use analgesics)	No	No	Yes	4	No
Faculty of Medicine	Male	22	Right Handed	7 Day/Week	2	Studying, Social Media	1		One hand	Supine position (Lying down)	Yes	Right Shoulder	2	1	In the Afternoon	4	No	I Did Not Use Any Agent	0 (Do not use analgesics)	No	No	Yes	2	Yes
Faculty of Dentistry	Female	21	Right Handed	7 Day/Week	12	Studying, Texting, Playing Games, Social Media, Watching Videos	2	20	Two hands	Sitting position	Yes	Neck	1	1	At night	3	No	I Did Not Use Any Agent	0 (Do not use analgesics)	No	Yes	Yes	1	Yes
Faculty of Medicine	Female	22	Right Handed	7 Day/Week	3	Texting, Social Media		3	One hand	Supine position (Lying down)	Yes	Neck	1	3	At night	4	No	Alternatives to Analgesics: Rest	1	No	Yes	Yes	2	No
Faculty of Medicine	Female	23	Right Handed	7 Day/Week	3	Studying, Texting, Social Media, Watching Videos	1	1	Two hands	Sitting position	Yes	Neck	3	1	In the Afternoon	7	No	I Did Not Use Any Agent	0 (Do not use analgesics)	No	Yes	Yes	5	Yes
Faculty of Medicine	Male	24	Right Handed	2 Day/Week	4.5	Studying, Playing Games	1		Two hands	Sitting position	Yes	Neck, Left Shoulder	1	1	Throughout the day	2	No	I Did Not Use Any Agent	0 (Do not use analgesics)	No	No	Yes	2	No
Faculty of Medicine	Female	22	Right Handed	7 Day/Week	4	Studying, Watching Videos	2		One hand	Sitting position	Yes	Left Shoulder	1	1	Throughout the day	1	No	I Did Not Use Any Agent	0 (Do not use analgesics)	No	No	Yes	1	Yes
Faculty of Medicine	Female	22	Right Handed	7 Day/Week	2	Social Media			One hand	Sitting position	Yes	Neck	3	2	In the Afternoon	5	No	I Did Not Use Any Agent	0 (Do not use analgesics)	No	Yes	Yes	5	Yes
Faculty of Medicine	Male	23	Right Handed	1 Day/Week	2	Studying, Texting, Social Media, Watching Videos	1	1	Two hands	Sitting position	Yes	Right Shoulder	1	1	At night	1	Yes	I Did Not Use Any Agent	1	No	No	No	1	No
Faculty of Medicine	Male	22	Right Handed	7 Day/Week	4	Studying, Texting, Working, Playing Games, Social Media, Watching Videos	1	1	One hand	Sitting position	Yes	Neck	1	1	In the morning	2	No	I Did Not Use Any Agent	0 (Do not use analgesics)	No	Yes	Yes	1	Yes
Faculty of Medicine	Male	24	Right Handed	7 Day/Week	10	Studying, Texting, Working, Playing Games, Social Media, Watching Videos	1		One hand	Sitting position	Yes	Right Shoulder	1	1	In the Afternoon	1	No	Alternatives to Analgesics: Rest, I Did Not Use Any Agent	0 (Do not use analgesics)	No	No	Yes	1	Yes
Faculty of Medicine	Female	24	Right Handed	7 Day/Week	6	Studying, Texting, Social Media	4	4	Two hands	Standing position	Yes	Neck, Right Shoulder	4	1	In the Afternoon	8	Yes	Paracetamol	1	No	Yes	Yes	4	Yes
Faculty of Medicine	Female	23	Right Handed	7 Day/Week	4	Studying, Texting, Social Media	1	2	One hand	Sitting position	Yes	Neck	1	2	At night	3	No	I Did Not Use Any Agent	0 (Do not use analgesics)	No	No	Yes	2	Yes
Faculty of Medicine	Female	22	Right Handed	7 Day/Week	3	Texting, Social Media, Watching Videos		6	Two hands	Sitting position	Yes	Neck	2	1	Throughout the day	2	Yes	Nonsteroidal Anti-Inflammatory Drugs (ibuprofen, panadol naproxen, and Aspirin...etc), Alternatives to Analgesics: Heat, Alternatives to Analgesics: Massage, Alternatives to Analgesics: Rest, Alternatives to Analgesics: Relaxation techniques	0 (Do not use analgesics)	No	No	Yes	1	No
Faculty of Medicine	Female	23	Right Handed	7 Day/Week	2	Studying, Texting, Social Media, Watching Videos	1	6	Two hands	Sitting position	Yes	Neck	2	2	In the Afternoon	4	Yes	Nonsteroidal Anti-Inflammatory Drugs (ibuprofen, panadol naproxen, and Aspirin...etc), Alternatives to Analgesics: Massage	1	No	Yes	Yes	2	No
Faculty of Medicine	Male	21	Right Handed	7 Day/Week	4	Texting, Social Media		30	One hand	Sitting position	Yes	Neck	2	1	At night	3	No	I Did Not Use Any Agent	0 (Do not use analgesics)	No	No	No	3	Yes
Faculty of Medicine	Female	23	Right Handed	7 Day/Week	14	Social Media			One hand	Sitting position	Yes	Neck, Right Shoulder	1	1	Throughout the day	1	Yes	Nonsteroidal Anti-Inflammatory Drugs (ibuprofen, panadol naproxen, and Aspirin...etc)	0 (Do not use analgesics)	No	No	No	1	Yes
Faculty of Medicine	Male	20	Right Handed	7 Day/Week	4	Texting, Playing Games, Social Media, Watching Videos		20	One hand	Supine position (Lying down)	Yes	Neck, Right Shoulder	3	3	At night	7	Yes	Nonsteroidal Anti-Inflammatory Drugs (ibuprofen, panadol naproxen, and Aspirin...etc), Alternatives to Analgesics: Massage, Alternatives to Analgesics: Rest	3	No	No	Yes	4	Yes
Faculty of Rehabilitation	Male	20	Right Handed	7 Day/Week	6	Texting, Working, Playing Games, Social Media, Watching Videos		40	Two hands	Supine position (Lying down)	Yes	Neck, Right Shoulder, Left Shoulder	7	3	At night	8	Yes	Nonsteroidal Anti-Inflammatory Drugs (ibuprofen, panadol naproxen, and Aspirin...etc), Alternatives to Analgesics: Heat, Alternatives to Analgesics: Massage, Alternatives to Analgesics: Rest	7	Yes, I've visited the Clinic	No	Yes	5	Yes
Faculty of Medicine	Female	21	Right Handed	7 Day/Week	3	Texting, Social Media, Watching Videos		25	Two hands	Sitting position	No	I don't have pain	I dont have pain	0	I Don't have pain	0	No	I Did Not Use Any Agent	0 (Do not use analgesics)	No	I don't have pain	I don't have pain	0	I don't have pain, but i believe that this type of pain is related to mobile phones use
Faculty of Medicine	Female	22	Left Handed	7 Day/Week	3	Studying, Texting, Working, Social Media, Watching Videos	2	2	Two hands	Sitting position	Yes	Neck	1	1	In the Afternoon	2	No	I Did Not Use Any Agent	0 (Do not use analgesics)	No	No	Yes	1	Yes
Faculty of Medicine	Male	24	Right Handed	7 Day/Week	6	Texting, Playing Games, Social Media, Watching Videos		700	One hand	Sitting position	No	I don't have pain	I dont have pain	0	I Don't have pain	0	No	I Did Not Use Any Agent	0 (Do not use analgesics)	No	I don't have pain	I don't have pain	0	I don't have pain, but i believe that this type of pain is related to mobile phones use
Faculty of Medicine	Female	22	Right Handed	7 Day/Week	6	Studying, Texting, Playing Games, Social Media, Watching Videos	2	100	One hand	Sitting position	No	I don't have pain	I dont have pain	0	I Don't have pain	0	No	I Did Not Use Any Agent	0 (Do not use analgesics)	No	I don't have pain	I don't have pain	0	I don't have pain, and I Don't believe that this type of pain is related to mobile phones use
Faculty of Medicine	Male	22	Left Handed	7 Day/Week	6	Texting, Playing Games, Social Media		50	Two hands	Sitting position	No	I don't have pain	I dont have pain	0	I Don't have pain	0	No	I Did Not Use Any Agent	0 (Do not use analgesics)	No	I don't have pain	I don't have pain	0	I don't have pain, but i believe that this type of pain is related to mobile phones use
Faculty of Pharmacy	Male	21	Right Handed	7 Day/Week	4.5	Texting, Social Media, Watching Videos		40	One hand	Sitting position	No	I don't have pain	I dont have pain	0	I Don't have pain	0	No	I Did Not Use Any Agent	0 (Do not use analgesics)	No	I don't have pain	I don't have pain	0	I don't have pain, but i believe that this type of pain is related to mobile phones use
Faculty of Dentistry	Female	22	Right Handed	7 Day/Week	4	Texting, Playing Games, Social Media, Watching Videos		20	One hand	Sitting position	No	I don't have pain	I dont have pain	0	I Don't have pain	0	No	I Did Not Use Any Agent	0 (Do not use analgesics)	No	I don't have pain	I don't have pain	0	I don't have pain, but i believe that this type of pain is related to mobile phones use
Faculty of Medicine	Female	23	Right Handed	7 Day/Week	6	Studying, Working, Social Media, Watching Videos	2		One hand	Supine position (Lying down)	No	I don't have pain	I dont have pain	0	I Don't have pain	0	No	I Did Not Use Any Agent	0 (Do not use analgesics)	No	I don't have pain	I don't have pain	0	I don't have pain, and I Don't believe that this type of pain is related to mobile phones use
Faculty of Medicine	Female	22	Right Handed	7 Day/Week	10	Studying, Texting, Social Media	2	100	Two hands	Sitting position	No	I don't have pain	I dont have pain	0	I Don't have pain	0	No	I Did Not Use Any Agent	0 (Do not use analgesics)	No	I don't have pain	I don't have pain	0	I don't have pain, but i believe that this type of pain is related to mobile phones use
Faculty of Medicine	Female	22	Right Handed	7 Day/Week	4	Studying, Texting, Social Media, Watching Videos	1	200	One hand	Sitting position	No	I don't have pain	I dont have pain	0	I Don't have pain	0	No	I Did Not Use Any Agent	0 (Do not use analgesics)	No	I don't have pain	I don't have pain	0	I don't have pain, and I Don't believe that this type of pain is related to mobile phones use
Faculty of Medicine	Female	22	Right Handed	7 Day/Week	7	Playing Games, Social Media, Watching Videos			Two hands	Supine position (Lying down)	No	I don't have pain	I dont have pain	0	I Don't have pain	0	No	I Did Not Use Any Agent	0 (Do not use analgesics)	No	I don't have pain	I don't have pain	0	I don't have pain, but i believe that this type of pain is related to mobile phones use
Faculty of Medicine	Female	22	Left Handed	2 Day/Week	1	Texting		2	Two hands	Standing position	Yes	Neck, Right Shoulder	1	5	Throughout the day	2	No	I Did Not Use Any Agent	0 (Do not use analgesics)	No	No	No	0	No
Faculty of Medicine	Female	23	Right Handed	7 Day/Week	3	Studying, Texting, Playing Games, Social Media, Watching Videos	1	40	Two hands	Sitting position	Yes	Neck	I dont have pain	0	I Don't have pain	3	No	Alternatives to Analgesics: Massage	0 (Do not use analgesics)	No	No	No	0	No
Faculty of Dentistry	Female	22	Right Handed	7 Day/Week	1	Texting		3	Two hands	Sitting position	Yes	Neck, Right Shoulder, Left Shoulder	3	2	In the Afternoon	3	Yes	Nonsteroidal Anti-Inflammatory Drugs (ibuprofen, panadol naproxen, and Aspirin...etc), Alternatives to Analgesics: Heat, Alternatives to Analgesics: Massage, Alternatives to Analgesics: Rest, Alternatives to Analgesics: Relaxation techniques	1	No	No	Yes	2	Yes
Faculty of Medicine	Female	22	Right Handed	7 Day/Week	4	Studying, Texting, Working, Playing Games, Social Media, Watching Videos	1	10	Two hands	Sitting position	Yes	I don't have pain	I dont have pain	0	I Don't have pain	0	No	I Did Not Use Any Agent	0 (Do not use analgesics)	No	I don't have pain	I don't have pain	0	I don't have pain, but i believe that this type of pain is related to mobile phones use
Faculty of Medicine	Male	22	Right Handed	7 Day/Week	3	Studying, Texting, Working, Playing Games, Social Media, Watching Videos	1	4	Two hands	Sitting position		Neck	1	1	In the morning	3	No	I Did Not Use Any Agent	0 (Do not use analgesics)	No	No	No	3	No
Faculty of Medicine	Female	23	Right Handed	7 Day/Week	5	Studying, Texting, Social Media, Watching Videos	1	150	Two hands	Sitting position	Yes	Neck, Right Shoulder	2	2	In the Afternoon	3	No	I Did Not Use Any Agent	0 (Do not use analgesics)	No	No	Yes	2	Yes
Faculty of Medicine	Female	24	Right Handed	7 Day/Week	1	Studying, Texting, Working, Social Media, Watching Videos	1	7	One hand	Sitting position	Yes	Neck	I dont have pain	0	I Don't have pain	0	Yes	Nonsteroidal Anti-Inflammatory Drugs (ibuprofen, panadol naproxen, and Aspirin...etc)	0 (Do not use analgesics)	No	I don't have pain	I don't have pain	0	No
Faculty of Medicine	Female	23	Right Handed	7 Day/Week	1	Playing Games, Social Media, Watching Videos			Two hands	Supine position (Lying down)	No	I don't have pain	I dont have pain	0	I Don't have pain	0	No	I Did Not Use Any Agent	0 (Do not use analgesics)	No	I don't have pain	I don't have pain	0	I don't have pain, but i believe that this type of pain is related to mobile phones use
Faculty of Medicine	Female	23	Left Handed	7 Day/Week	2	Studying, Texting, Playing Games, Social Media	1	4	One hand	Sitting position	Yes	Neck, Right Shoulder, Left Shoulder	3	1	In the morning	2	No	Alternatives to Analgesics: Massage, Alternatives to Analgesics: Rest, Alternatives to Analgesics: Relaxation techniques	0 (Do not use analgesics)	No	No	No	2	Yes
Faculty of Medicine	Female	24	Right Handed	7 Day/Week	6	Studying, Texting, Playing Games, Social Media	2	1	One hand	Sitting position	No	I don't have pain	I dont have pain	0	I Don't have pain	0	No	I Did Not Use Any Agent	0 (Do not use analgesics)	No	I don't have pain	I don't have pain	0	I don't have pain, but i believe that this type of pain is related to mobile phones use
Faculty of Medicine	Female	22	Right Handed	7 Day/Week	8	Studying, Texting, Social Media, Watching Videos	2	2	One hand	Sitting position	No	I don't have pain	I dont have pain	0	I Don't have pain	0	No	Nonsteroidal Anti-Inflammatory Drugs (ibuprofen, panadol naproxen, and Aspirin...etc), Alternatives to Analgesics: Massage, Alternatives to Analgesics: Rest	0 (Do not use analgesics)	No	I don't have pain	I don't have pain	0	I don't have pain, but i believe that this type of pain is related to mobile phones use
Faculty of Medicine	Female	20	Left Handed	7 Day/Week	4	Texting, Social Media, Watching Videos		100	One hand	Sitting position	No	I don't have pain	I dont have pain	0	I Don't have pain	0	No	I Did Not Use Any Agent	0 (Do not use analgesics)	No	I don't have pain	I don't have pain	0	I don't have pain, and I Don't believe that this type of pain is related to mobile phones use
Faculty of Pharmacy	Female	20	Right Handed	1 Day/Week	4	Watching Videos			One hand	Walking position	No	Neck	1	1	Throughout the day	1	No	I Did Not Use Any Agent	0 (Do not use analgesics)	No	Yes	Yes	0	I don't have pain, but i believe that this type of pain is related to mobile phones use
Faculty of Medicine	Female	20	Right Handed	7 Day/Week	3	Studying, Texting	3	1	One hand	Sitting position	Yes	Neck	2	2	Throughout the day	3	No	I Did Not Use Any Agent	0 (Do not use analgesics)	No	Yes	Yes	0	No
Faculty of Medicine	Female	20	Right Handed	7 Day/Week	4	Studying, Texting, Playing Games, Social Media, Watching Videos	1	1000	Two hands	Supine position (Lying down)	Yes	Neck, I don't have pain	I dont have pain	0	I Don't have pain	2	No	I Did Not Use Any Agent	1	No	I don't have pain	Yes	1	I don't have pain, and I Don't believe that this type of pain is related to mobile phones use
Faculty of Medicine	Male	20	Right Handed	7 Day/Week	1	Texting, Social Media		1	One hand	Sitting position	No	I don't have pain	I dont have pain	0	I Don't have pain	0	No	I Did Not Use Any Agent	0 (Do not use analgesics)	No	I don't have pain	I don't have pain	0	I don't have pain, but i believe that this type of pain is related to mobile phones use
Faculty of Medicine	Female	20	Right Handed	7 Day/Week	6	Studying, Texting, Working, Playing Games, Social Media, Watching Videos	3	6	Two hands	Sitting position	Yes	I don't have pain	I dont have pain	0	I Don't have pain	0	No	Masage	0 (Do not use analgesics)	No	I don't have pain	I don't have pain	0	I don't have pain, but i believe that this type of pain is related to mobile phones use
Faculty of Rehabilitation	Female	22	Right Handed	7 Day/Week	5	Texting, Playing Games, Social Media, Watching Videos			Two hands	Sitting position	No	I don't have pain	I dont have pain	0	I Don't have pain	1	No	I Did Not Use Any Agent	0 (Do not use analgesics)	No	I don't have pain	I don't have pain	0	I don't have pain, but i believe that this type of pain is related to mobile phones use
Faculty of Dentistry	Female	23	Right Handed	7 Day/Week	6	Studying, Texting, Working, Playing Games, Social Media, Watching Videos	5	20	One hand	Sitting position	No	I don't have pain	I dont have pain	0	I Don't have pain	0	No	I Did Not Use Any Agent	0 (Do not use analgesics)	No	I don't have pain	I don't have pain	0	I don't have pain, but i believe that this type of pain is related to mobile phones use
Faculty of Medicine	Male	22	Left Handed	3 Day/Week	5	Studying, Texting, Social Media, Watching Videos	1	40	Two hands	Sitting position	Yes	Neck	1	1	At night	4	No	I Did Not Use Any Agent	0 (Do not use analgesics)	No	No	No	4	No
Faculty of Pharmacy	Female	22	Right Handed	1 Day/Week	4	Studying, Texting, Social Media	1	1	One hand	Supine position (Lying down)	Yes	Neck	1	1	In the Afternoon	5	No	I Did Not Use Any Agent	0 (Do not use analgesics)	No	No	Yes	2	Yes
Faculty of Medicine	Male	22	Right Handed	7 Day/Week	6	Studying, Texting, Playing Games, Social Media, Watching Videos	1	100	One hand	Supine position (Lying down)	Yes	Neck	2	2	At night	3	No	I Did Not Use Any Agent	0 (Do not use analgesics)	No	No	Yes	3	Yes
Faculty of Medicine	Male	22	Right Handed	7 Day/Week	6	Studying, Texting, Playing Games, Social Media, Watching Videos	1	4	One hand	Supine position (Lying down)	Yes	Neck	1	1	At night	4	Yes	Nonsteroidal Anti-Inflammatory Drugs (ibuprofen, panadol naproxen, and Aspirin...etc), Alternatives to Analgesics: Rest	1	No	No	No	4	Yes
Faculty of Medicine	Female	23	Right Handed	7 Day/Week	15	Social Media			One hand	Sitting position	Yes	Neck	3	3	In the Afternoon	5	No	I Did Not Use Any Agent	0 (Do not use analgesics)	No	No	Yes	4	Yes
Faculty of Medicine	Female	22	Right Handed	7 Day/Week	2	Texting, Social Media		10	Two hands	Sitting position	No	I don't have pain	I dont have pain	0	I Don't have pain	0	No	I Did Not Use Any Agent	0 (Do not use analgesics)	No	I don't have pain	I don't have pain	0	I don't have pain, but i believe that this type of pain is related to mobile phones use
Faculty of Medicine	Female	22	Right Handed	7 Day/Week	5	Studying, Texting, Playing Games, Social Media	1	20	One hand	Sitting position	No	I don't have pain	I dont have pain	0	I Don't have pain	0	No	I Did Not Use Any Agent	0 (Do not use analgesics)	No	I don't have pain	I don't have pain	0	I don't have pain, but i believe that this type of pain is related to mobile phones use
Faculty of Medicine	Male	29	Right Handed	7 Day/Week	6	Studying, Social Media	3	15	Two hands	Sitting position	No	Neck, Right Shoulder	2	2	At night	4	No	Nonsteroidal Anti-Inflammatory Drugs (ibuprofen, panadol naproxen, and Aspirin...etc)	0 (Do not use analgesics)	No	Yes	Yes	2	Yes
Faculty of Medicine	Female	22	Right Handed	7 Day/Week	5	Studying, Texting, Social Media, Watching Videos	3	2	One hand	Sitting position	Yes	Right Shoulder	2	1	In the Afternoon	5	Yes	Nonsteroidal Anti-Inflammatory Drugs (ibuprofen, panadol naproxen, and Aspirin...etc)	1	No	No	Yes	1	No
Faculty of Dentistry	Male	21	Right Handed	7 Day/Week	4	Texting, Social Media, Watching Videos		20	Two hands	Sitting position	No	I don't have pain	I dont have pain	0	I Don't have pain	0	No	I Did Not Use Any Agent	0 (Do not use analgesics)	No	I don't have pain	I don't have pain	0	I don't have pain, but i believe that this type of pain is related to mobile phones use
Faculty of Dentistry	Male	22	Right Handed	7 Day/Week	5	Studying, Texting, Playing Games, Social Media, Watching Videos	2	25	Two hands	Walking position	No	I don't have pain	I dont have pain	0	I Don't have pain	0	No	I Did Not Use Any Agent	0 (Do not use analgesics)	No	I don't have pain	I don't have pain	0	I don't have pain, but i believe that this type of pain is related to mobile phones use
Faculty of Medicine	Female	22	Right Handed	7 Day/Week	3	Studying, Texting, Social Media	1	50	One hand	Sitting position	No	I don't have pain	I dont have pain	0	I Don't have pain	0	No	I Did Not Use Any Agent	0 (Do not use analgesics)	No	I don't have pain	I don't have pain	0	I don't have pain, and I Don't believe that this type of pain is related to mobile phones use
Faculty of Medicine	Male	22	Left Handed	7 Day/Week	3	Texting, Social Media, Watching Videos		10	Two hands	Sitting position	No	I don't have pain	I dont have pain	0	I Don't have pain	0	No	I Did Not Use Any Agent	0 (Do not use analgesics)	No	I don't have pain	I don't have pain	0	I don't have pain, but i believe that this type of pain is related to mobile phones use
Faculty of Rehabilitation	Female	19	Right Handed	7 Day/Week	12	Studying, Texting, Watching Videos	5	10	One hand	Sitting position	No	Neck, I don't have pain	1	0	I Don't have pain	3	No	I Did Not Use Any Agent	0 (Do not use analgesics)	No	I don't have pain	I don't have pain	0	No
Faculty of Rehabilitation	Female	19	Right Handed	7 Day/Week	9	Studying, Watching Videos	8		One hand	Sitting position	Yes	Neck	1	4	Throughout the day	2	No	I Did Not Use Any Agent	0 (Do not use analgesics)	No	Yes	Yes	2	Yes
Faculty of Rehabilitation	Female	29	Right Handed	1 Day/Week	5	Studying, Texting, Social Media	1	2	Two hands	Sitting position	Yes	Neck	1	0	Throughout the day	1	No	I Did Not Use Any Agent	0 (Do not use analgesics)	No	No	No	1	Yes
Faculty of Rehabilitation	Female	20	Right Handed	7 Day/Week	5	Texting, Playing Games, Social Media, Watching Videos		20	One hand	Sitting position	Yes	Left Shoulder	4	2	Throughout the day	8	No	I Did Not Use Any Agent	0 (Do not use analgesics)	No	No	Yes	8	Yes
Faculty of Rehabilitation	Female	20	Right Handed	7 Day/Week	2	Studying, Texting, Social Media, Watching Videos	6	30	One hand	Sitting position	Yes	Neck	1	0.1	At night	1	No	I Did Not Use Any Agent	0 (Do not use analgesics)	No	Yes	Yes	0	I don't have pain, but i believe that this type of pain is related to mobile phones use
Faculty of Rehabilitation	Male	21	Left Handed	7 Day/Week	4	Studying, Social Media, Watching Videos	1		One hand	Sitting position	Yes	Neck	1	8	In the morning	3	Yes	Alternatives to Analgesics: Massage, Alternatives to Analgesics: Rest, Alternatives to Analgesics: Relaxation techniques	1	No	No	Yes	3	Yes
Faculty of Rehabilitation	Female	19	Right Handed	4 Day/Week	7	Studying, Social Media, Watching Videos	4		One hand	Sitting position	Yes	Neck	3	1	At night	5	No	I Did Not Use Any Agent	7	No	Yes	Yes	5	Yes
Faculty of Rehabilitation	Female	19	Right Handed	1 Day/Week	2	Studying, Texting, Working, Playing Games, Social Media, Watching Videos	1	20	One hand	Sitting position	Yes	I don't have pain	I dont have pain	0	I Don't have pain	0	No	I Did Not Use Any Agent	0 (Do not use analgesics)	No	I don't have pain	I don't have pain	0	I don't have pain, and I Don't believe that this type of pain is related to mobile phones use
Faculty of Rehabilitation	Male	22	Right Handed	7 Day/Week	7	Studying, Texting, Playing Games, Social Media, Watching Videos	1	5	One hand	Sitting position	Yes	Neck	2	4	In the Afternoon	2	No	I Did Not Use Any Agent	0 (Do not use analgesics)	No	No	No	2	Yes
Faculty of Medicine	Female	26	Left Handed	7 Day/Week	10	Social Media, Watching Videos			One hand	Supine position (Lying down)	No	I don't have pain	I dont have pain	0	I Don't have pain	0	No	I Did Not Use Any Agent	0 (Do not use analgesics)	No	I don't have pain	I don't have pain	0	I don't have pain, but i believe that this type of pain is related to mobile phones use
Faculty of Medicine	Female	22	Right Handed	3 Day/Week	5	Studying, Texting, Social Media	1	100	One hand	Sitting position	No	I don't have pain	I dont have pain	0	I Don't have pain	0	No	I Did Not Use Any Agent	1	No	I don't have pain	I don't have pain	0	I don't have pain, but i believe that this type of pain is related to mobile phones use
Faculty of Medicine	Male	21	Right Handed	7 Day/Week	10	Studying, Playing Games, Social Media, Watching Videos	2	1	One hand	Supine position (Lying down)	No	I don't have pain	I dont have pain	0	I Don't have pain	0	No	I Did Not Use Any Agent	0 (Do not use analgesics)	No	I don't have pain	I don't have pain	0	I don't have pain, but i believe that this type of pain is related to mobile phones use
Faculty of Medicine	Female	22	Right Handed	7 Day/Week	4	Studying, Texting, Working, Social Media	1.5	1	One hand	Sitting position	Yes	Neck, Right Shoulder	5	4	Throughout the day	2	Yes	Nonsteroidal Anti-Inflammatory Drugs (ibuprofen, panadol naproxen, and Aspirin...etc), Alternatives to Analgesics: Massage, Alternatives to Analgesics: Rest, Alternatives to Analgesics: Relaxation techniques	2	Yes, I've visited the Clinic	No	No	2	No
Faculty of Rehabilitation	Female	20	Right Handed	7 Day/Week	4	Texting, Playing Games, Social Media, Watching Videos			Two hands	Supine position (Lying down)	Yes	Left Shoulder	1	1	In the morning	2	No	I Did Not Use Any Agent	0 (Do not use analgesics)	No	No	No	1	No
Faculty of Medicine	Female	26	Right Handed	7 Day/Week	3	Texting, Social Media, Watching Videos		50	Two hands	Sitting position	Yes	Right Shoulder, Left Shoulder	2	1	In the Afternoon	1	No	Alternatives to Analgesics: Rest	0 (Do not use analgesics)	No	No	Yes	1	No
Faculty of Medicine	Male	23	Left Handed	7 Day/Week	1	Texting, Social Media		10	Two hands	Sitting position	No	I don't have pain	I dont have pain	0	I Don't have pain	0	No	I Did Not Use Any Agent	0 (Do not use analgesics)	No	I don't have pain	I don't have pain	0	I don't have pain, but i believe that this type of pain is related to mobile phones use
Faculty of Medicine	Female	21	Right Handed	7 Day/Week	7	Studying, Texting, Social Media, Watching Videos	1	5	One hand	Supine position (Lying down)	Yes	Neck	2	1	Throughout the day	3	No	I Did Not Use Any Agent	0 (Do not use analgesics)	Yes, I've visited the Clinic	Yes	Yes	2	Yes
Faculty of Medicine	Male	25	Right Handed	7 Day/Week	5	Studying, Texting, Working, Playing Games, Social Media, Watching Videos	1	2	Two hands	Sitting position	Yes	Neck	2	1	At night	3	No	I Did Not Use Any Agent	0 (Do not use analgesics)	No	No	Yes	1	Yes
Faculty of Medicine	Male	20	Right Handed	7 Day/Week	5	Texting, Social Media, Watching Videos		300	One hand	Sitting position	Yes	Neck, Right Shoulder	1	1	At night	6	Yes	Nonsteroidal Anti-Inflammatory Drugs (ibuprofen, panadol naproxen, and Aspirin...etc)	2	No	No	Yes	6	Yes
Faculty of Pharmacy	Female	22	Right Handed	7 Day/Week	3	Texting, Social Media, Watching Videos		15	Two hands	Standing position	Yes	Neck	2	1	At night	3	Yes	Alternatives to Analgesics: Massage, Alternatives to Analgesics: Rest	2	No	No	Yes	0	Yes
Faculty of Dentistry	Female	24	Right Handed	7 Day/Week	3	Studying, Texting, Working, Social Media, Watching Videos	1	300	Two hands	Sitting position	Yes	Neck, Right Shoulder, Left Shoulder	6	18	In the morning	8	Yes	Nonsteroidal Anti-Inflammatory Drugs (ibuprofen, panadol naproxen, and Aspirin...etc)	1	No	No	No	8	Yes
Faculty of Medicine	Male	22	Right Handed	7 Day/Week	4	Studying, Texting, Working, Playing Games, Social Media, Watching Videos	1	2	Two hands	Walking position	Yes	Neck	3	3	At night	4	No	I Did Not Use Any Agent	0 (Do not use analgesics)	Yes, I've visited the Clinic	No	Yes	4	Yes
Faculty of Medicine	Female	22	Right Handed	7 Day/Week	5	Studying, Texting, Playing Games, Social Media, Watching Videos	2	2	One hand	Sitting position	Yes	Neck, Left Shoulder	4	2	At night	7	Yes	Nonsteroidal Anti-Inflammatory Drugs (ibuprofen, panadol naproxen, and Aspirin...etc), Alternatives to Analgesics: Relaxation techniques	1	Yes, I've visited the Clinic	No	Yes	5	Yes
Faculty of Medicine	Female	22	Right Handed	7 Day/Week	10	Studying, Texting, Playing Games, Social Media, Watching Videos	3	16	One hand	Sitting position	Yes	Neck, Right Shoulder, Left Shoulder	1	1	In the morning	1	No	I Did Not Use Any Agent	0 (Do not use analgesics)	No	No	Yes	0	No
Faculty of Medicine	Male	43	Right Handed	7 Day/Week	4	Studying, Texting, Social Media	1	10	One hand	Sitting position	No	Neck	5	1	Throughout the day	4	No	I Did Not Use Any Agent	0 (Do not use analgesics)	No	Yes	No	4	Yes
Faculty of Medicine	Male	23	Right Handed	7 Day/Week	4	Studying, Texting, Playing Games, Social Media	1	3	One hand	Sitting position	No	I don't have pain	I dont have pain	0	I Don't have pain	0	No	I Did Not Use Any Agent	0 (Do not use analgesics)	No	I don't have pain	I don't have pain	0	I don't have pain, but i believe that this type of pain is related to mobile phones use
Faculty of Medicine	Female	20	Right Handed	7 Day/Week	1.5	Texting, Social Media		6	One hand	Sitting position	Yes	Neck	1	1	In the morning	2	No	I Did Not Use Any Agent	0 (Do not use analgesics)	No	No	Yes	1	Yes
Faculty of Medicine	Female	18	Right Handed	7 Day/Week	7	Studying, Texting, Working, Social Media, Watching Videos	5	4	Two hands	Sitting position	Yes	Neck	4	1	In the morning	2	No	I Did Not Use Any Agent	0 (Do not use analgesics)	No	Yes	Yes	1	Yes
Faculty of Medicine	Male	26	Right Handed	7 Day/Week	3	Texting, Working, Social Media		200	Two hands	Supine position (Lying down)	No	I don't have pain	I dont have pain	0	I Don't have pain	0	No	I Did Not Use Any Agent	0 (Do not use analgesics)	No	I don't have pain	I don't have pain	0	I don't have pain, but i believe that this type of pain is related to mobile phones use
Faculty of Medicine	Female	21	Right Handed	7 Day/Week	3	Texting, Social Media, Watching Videos		10	One hand	Sitting position	Yes	Neck	4	3	In the morning	6	Yes	Nonsteroidal Anti-Inflammatory Drugs (ibuprofen, panadol naproxen, and Aspirin...etc), Alternatives to Analgesics: Relaxation techniques	2	No	No	No	5	No
Faculty of Pharmacy	Female	22	Right Handed	3 Day/Week	4	Social Media			Two hands	Supine position (Lying down)	No	Neck, I don't have pain	I dont have pain	0	I Don't have pain	0	No	I Did Not Use Any Agent	0 (Do not use analgesics)	No	I don't have pain	I don't have pain	0	I don't have pain, but i believe that this type of pain is related to mobile phones use
Faculty of Medicine	Male	19	Right Handed	7 Day/Week	5	Studying, Texting, Social Media, Watching Videos	2	1	One hand	Supine position (Lying down)	No	I don't have pain	I dont have pain	0	I Don't have pain	0	No	I Did Not Use Any Agent	0 (Do not use analgesics)	No	I don't have pain	I don't have pain	0	I don't have pain, but i believe that this type of pain is related to mobile phones use
Faculty of Dentistry	Female	18	Left Handed	7 Day/Week	7	Texting, Social Media, Watching Videos		250	Two hands	Sitting position	Yes	Neck, Left Shoulder	1	1	In the morning	1	No	I Did Not Use Any Agent	0 (Do not use analgesics)	No	No	Yes	0	I don't have pain, but i believe that this type of pain is related to mobile phones use
Faculty of Medicine	Female	18	Right Handed	7 Day/Week	5	Studying, Texting, Working, Playing Games, Social Media, Watching Videos	1	500	One hand	Sitting position	No	Right Shoulder, Left Shoulder	2	0.5	At night	2	No	I Did Not Use Any Agent	0 (Do not use analgesics)	No	No	No	2	No
Faculty of Dentistry	Female	18	Right Handed	7 Day/Week	10	Studying, Texting, Playing Games, Social Media, Watching Videos	1	100	One hand	Standing position	Yes	Neck	2	1	Throughout the day	2	No	I Did Not Use Any Agent	0 (Do not use analgesics)	No	No	Yes	1	No
Faculty of Medicine	Female	19	Right Handed	7 Day/Week	10	Studying, Texting, Social Media, Watching Videos	2	100	One hand	Standing position	Yes	Neck, Right Shoulder, Left Shoulder	7	0.3	Throughout the day	4	No	I Did Not Use Any Agent	0 (Do not use analgesics)	No	Yes	Yes	4	Yes
Faculty of Dentistry	Female	21	Right Handed	7 Day/Week	3	Studying, Social Media, Watching Videos	2	1	Two hands	Sitting position	No	I don't have pain	I dont have pain	0	I Don't have pain	0	No	I Did Not Use Any Agent	0 (Do not use analgesics)	No	I don't have pain	I don't have pain	0	I don't have pain, but i believe that this type of pain is related to mobile phones use
Faculty of Medicine	Male	23	Right Handed	7 Day/Week	4	Studying, Texting, Social Media	1	100	Two hands	Sitting position	Yes	Neck	1	0.2	At night	2	No	I Did Not Use Any Agent	0 (Do not use analgesics)	No	No	Yes	0	Yes
Faculty of Medicine	Male	18	Right Handed	7 Day/Week	3	Studying, Texting, Social Media, Watching Videos	1	1	Two hands	Sitting position	No	I don't have pain	I dont have pain	0	I Don't have pain	0	No	I Did Not Use Any Agent	0 (Do not use analgesics)	No	I don't have pain	I don't have pain	0	I don't have pain, but i believe that this type of pain is related to mobile phones use
Faculty of Medicine	Male	18	Left Handed	7 Day/Week	12	Studying, Texting, Playing Games, Social Media, Watching Videos	3	150	One hand	Standing position	Yes	Neck, Right Shoulder	7	4	Throughout the day	5	No	I Did Not Use Any Agent	0 (Do not use analgesics)	No	No	No	5	Yes
Faculty of Dentistry	Female	18	Right Handed	7 Day/Week	17	Social Media	3	2000	One hand	Sitting position	Yes	Neck	4	4	At night	7	No	I Did Not Use Any Agent	0 (Do not use analgesics)	No	No	No	7	Yes
Faculty of Dentistry	Male	19	Right Handed	7 Day/Week	7	Studying, Texting, Playing Games, Social Media, Watching Videos	1	1000	One hand	Sitting position	Yes	Neck	1	3	In the morning	8	Yes	Alternatives to Analgesics: Massage, Alternatives to Analgesics: Rest	0 (Do not use analgesics)	No	No	No	3	Yes
Faculty of Dentistry	Female	19	Right Handed	7 Day/Week	6	Texting, Social Media, Watching Videos		24	Two hands	Sitting position	Yes	Neck, Right Shoulder, Left Shoulder	5	24	Throughout the day	7	No	I Did Not Use Any Agent	7	No	No	Yes	7	No
Faculty of Medicine	Female	18	Right Handed	1 Day/Week	4	Studying, Texting, Watching Videos	1	1	One hand	Sitting position	Yes	Neck, Right Shoulder	1	1	Throughout the day	4	No	I Did Not Use Any Agent	0 (Do not use analgesics)	No	No	No	4	Yes
Faculty of Dentistry	Female	19	Right Handed	7 Day/Week	15	Texting, Social Media, Watching Videos		30	Two hands	Supine position (Lying down)	No	Neck	1	2	At night	2	Yes	Nonsteroidal Anti-Inflammatory Drugs (ibuprofen, panadol naproxen, and Aspirin...etc), Alternatives to Analgesics: Heat, Alternatives to Analgesics: Rest	1	Yes, I've visited the Clinic	No	No	1	Yes
Faculty of Medicine	Male	19	Right Handed	7 Day/Week	3	Studying, Texting, Social Media, Watching Videos	1	100	Two hands	Sitting position	Yes	Neck, Right Shoulder, Left Shoulder	7	2	At night	7	Yes	I Did Not Use Any Agent	2	Yes, I've Visited the Emergency Department	No	No	2	I don't have pain, and I Don't believe that this type of pain is related to mobile phones use
Faculty of Medicine	Male	18	Right Handed	7 Day/Week	5	Studying, Texting, Working, Playing Games, Social Media, Watching Videos	1	2	One hand	Sitting position	No	I don't have pain	I dont have pain	0	I Don't have pain	0	No	I Did Not Use Any Agent	0 (Do not use analgesics)	No	I don't have pain	I don't have pain	0	I don't have pain, but i believe that this type of pain is related to mobile phones use
Faculty of Medicine	Male	21	Right Handed	7 Day/Week	18	Social Media			Two hands	Sitting position	Yes	Neck	1	1	At night	5	No	Nonsteroidal Anti-Inflammatory Drugs (ibuprofen, panadol naproxen, and Aspirin...etc)	1	No	No	No	4	Yes
Faculty of Dentistry	Female	18	Right Handed	7 Day/Week	24	Social Media			Two hands	Sitting position	Yes	Neck, Right Shoulder	1	1	Throughout the day	1	No	Alternatives to Analgesics: Massage, I Did Not Use Any Agent	0 (Do not use analgesics)	No	No	No	1	Yes
Faculty of Dentistry	Male	18	Right Handed	7 Day/Week	5	Social Media			One hand	Sitting position	No	I don't have pain	I dont have pain	0	I Don't have pain	0	No	I Did Not Use Any Agent	0 (Do not use analgesics)	No	I don't have pain	I don't have pain	0	I don't have pain, but i believe that this type of pain is related to mobile phones use
Faculty of Dentistry	Female	18	Right Handed	7 Day/Week	15	Studying, Texting, Working, Playing Games, Social Media, Watching Videos	2	100	One hand	Supine position (Lying down)	No	Neck	7	3	Throughout the day	6	No	I Did Not Use Any Agent	0 (Do not use analgesics)	No	No	Yes	0	Yes
Faculty of Dentistry	Male	20	Right Handed	7 Day/Week	5	Social Media	2	20	One hand	Supine position (Lying down)	Yes	Left Shoulder	1	0	Throughout the day	3	No	I Did Not Use Any Agent	0 (Do not use analgesics)	No	No	Yes	3	Yes
Faculty of Dentistry	Female	18	Right Handed	1 Day/Week	10	Studying, Texting, Working, Playing Games, Social Media, Watching Videos	1	20	Two hands	Supine position (Lying down)	No	I don't have pain	I dont have pain	0	I Don't have pain	0	No	I Did Not Use Any Agent	0 (Do not use analgesics)	No	I don't have pain	I don't have pain	0	I don't have pain, but i believe that this type of pain is related to mobile phones use
Faculty of Dentistry	Male	19	Right Handed	7 Day/Week	6	Studying, Watching Videos	5	22	Two hands	Sitting position	No	Left Shoulder, I don't have pain	1	0	I Don't have pain	0	No	I Did Not Use Any Agent	0 (Do not use analgesics)	No	I don't have pain	I don't have pain	0	I don't have pain, and I Don't believe that this type of pain is related to mobile phones use
Faculty of Medicine	Male	18	Left Handed	7 Day/Week	7	Studying, Texting, Working, Playing Games, Social Media, Watching Videos	2	100	One hand	Sitting position	Yes	Neck	1	1	In the Afternoon	1	No	I Did Not Use Any Agent	0 (Do not use analgesics)	No	No	Yes	2	Yes
Faculty of Medicine	Male	19	Left Handed	7 Day/Week	15	Social Media	5	200	Two hands	Supine position (Lying down)	Yes	Neck	4	3	At night	4	No	I Did Not Use Any Agent	0 (Do not use analgesics)	No	No	No	0	Yes
Faculty of Dentistry	Male	18	Right Handed	1 Day/Week	13	Studying, Texting, Social Media, Watching Videos	3		One hand	Sitting position	Yes	Neck	7	4	Throughout the day	4	No	I Did Not Use Any Agent	0 (Do not use analgesics)	No	No	No	0	No
Faculty of Dentistry	Male	18	Right Handed	7 Day/Week	5	Studying, Social Media	2	100	Two hands	Supine position (Lying down)	No	I don't have pain	I dont have pain	0	I Don't have pain	0	No	I Did Not Use Any Agent	0 (Do not use analgesics)	No	I don't have pain	I don't have pain	0	I don't have pain, but i believe that this type of pain is related to mobile phones use
Faculty of Dentistry	Female	19	Right Handed	7 Day/Week	15	Studying, Texting, Social Media	3	20	One hand	Sitting position	Yes	Neck, Right Shoulder	2	3	At night	6	No	I Did Not Use Any Agent	0 (Do not use analgesics)	No	Yes	Yes	1	Yes
Faculty of Medicine	Female	18	Right Handed	7 Day/Week	9	Studying, Social Media	4		Two hands	Sitting position	Yes	Neck	5	24	Throughout the day	5	No	I Did Not Use Any Agent	3	No	No	No	2	Yes
Faculty of Dentistry	Male	20	Right Handed	7 Day/Week	6	Studying, Texting, Playing Games, Social Media, Watching Videos	2	300	Two hands	Supine position (Lying down)	Yes	Neck	3	1	In the Afternoon	3	No	I Did Not Use Any Agent	0 (Do not use analgesics)	No	No	No	4	Yes
Faculty of Medicine	Male	18	Left Handed	7 Day/Week	17	Studying, Texting, Social Media, Watching Videos	3	300	Two hands	Sitting position	Yes	I don't have pain	I dont have pain	0	I Don't have pain	0	No	I Did Not Use Any Agent	0 (Do not use analgesics)	Yes, I've visited the Clinic	No	No	0	I don't have pain, but i believe that this type of pain is related to mobile phones use
Faculty of Medicine	Female	18	Right Handed	7 Day/Week	5	Studying, Texting, Playing Games, Social Media	2	1	Two hands	Sitting position	Yes	Right Shoulder	2	1	In the morning	2	No	I Did Not Use Any Agent	0 (Do not use analgesics)	No	No	No	2	No
Faculty of Dentistry	Male	19	Right Handed	7 Day/Week	12	Studying, Texting, Playing Games, Social Media	3	4	Two hands	Sitting position	Yes	Neck	7	3	At night	6	No	I Did Not Use Any Agent	0 (Do not use analgesics)	No	Yes	No	4	No
Faculty of Medicine	Male	19	Right Handed	7 Day/Week	5	Studying, Texting, Playing Games, Social Media, Watching Videos	1	180	One hand	Supine position (Lying down)	Yes	Neck	1	1	At night	4	No	I Did Not Use Any Agent	0 (Do not use analgesics)	No	No	Yes	0	Yes
Faculty of Medicine	Female	18	Right Handed	7 Day/Week	8	Texting, Social Media, Watching Videos		80	Two hands	Sitting position	Yes	Right Shoulder, Left Shoulder	1	1	Throughout the day	2	No	I Did Not Use Any Agent	0 (Do not use analgesics)	No	No	No	0	Yes
Faculty of Dentistry	Female	18	Right Handed	7 Day/Week	24	Texting, Social Media		100	Two hands	Sitting position	Yes	Neck	1	1	Throughout the day	5	No	I Did Not Use Any Agent	0 (Do not use analgesics)	No	No	No	5	Yes
Faculty of Dentistry	Female	19	Right Handed	3 Day/Week	20	Studying, Texting, Social Media, Watching Videos			One hand	Supine position (Lying down)	Yes	Neck, Right Shoulder	2	2	At night	2	Yes	Alternatives to Analgesics: Heat	0 (Do not use analgesics)	No	No	No	1	Yes
Faculty of Medicine	Male	21	Left Handed	7 Day/Week	16	Studying, Texting, Working, Playing Games, Social Media, Watching Videos	1	200	Two hands	Sitting position	No	I don't have pain	I dont have pain	0	I Don't have pain	0	No	I Did Not Use Any Agent	1	Yes, I've Visited the Emergency Department	I don't have pain	No	0	I don't have pain, and I Don't believe that this type of pain is related to mobile phones use
Faculty of Medicine	Female	17	Right Handed	5 Day/Week	6	Studying, Texting, Social Media, Watching Videos	1	30	Two hands	Sitting position	Yes	Neck	3	4	Throughout the day	3	Yes	Alternatives to Analgesics: Heat	0 (Do not use analgesics)	No	No	Yes	2	No
Faculty of Medicine	Male	1	Right Handed	7 Day/Week	12	Watching Videos	1		One hand	Sitting position	No	I don't have pain	I dont have pain	0	I Don't have pain	0	No	I Did Not Use Any Agent	0 (Do not use analgesics)	No	I don't have pain	I don't have pain	0	I don't have pain, but i believe that this type of pain is related to mobile phones use
Faculty of Medicine	Female	19	Right Handed	7 Day/Week	10	Texting, Playing Games, Social Media, Watching Videos		2	One hand	Standing position	Yes	Neck	2	3	Throughout the day	2	No	I Did Not Use Any Agent	0 (Do not use analgesics)	No	No	Yes	2	Yes
Faculty of Dentistry	Female	17	Right Handed	7 Day/Week	3	Social Media			Two hands	Sitting position	No	I don't have pain	I dont have pain	0	I Don't have pain	0	No	I Did Not Use Any Agent	0 (Do not use analgesics)	No	I don't have pain	I don't have pain	0	I don't have pain, and I Don't believe that this type of pain is related to mobile phones use
Faculty of Medicine	Female	18	Right Handed	7 Day/Week	9	Studying, Texting, Watching Videos	9	20	One hand	Supine position (Lying down)	Yes	Neck, Right Shoulder, Left Shoulder	3	5	Throughout the day	6	No	I Did Not Use Any Agent	0 (Do not use analgesics)	No	Yes	Yes	4	Yes
Faculty of Medicine	Female	20	Right Handed	7 Day/Week	10	Texting, Working, Social Media, Watching Videos		20	One hand	Walking position	Yes	Neck, Right Shoulder	3	1	Throughout the day	4	No	I Did Not Use Any Agent	0 (Do not use analgesics)	No	Yes	Yes	2	Yes
Faculty of Medicine	Female	21	Right Handed	7 Day/Week	3	Studying, Texting, Social Media, Watching Videos	1	20	Two hands	Sitting position	Yes	Right Shoulder	3	1	In the morning	3	Yes	Nonsteroidal Anti-Inflammatory Drugs (ibuprofen, panadol naproxen, and Aspirin...etc), Alternatives to Analgesics: Heat, Alternatives to Analgesics: Rest	1	No	No	No	3	Yes
Faculty of Dentistry	Female	19	Right Handed	7 Day/Week	6	Studying, Texting, Social Media			One hand	Sitting position	Yes	Neck	7	1	Throughout the day	4	No	I Did Not Use Any Agent	0 (Do not use analgesics)	No	No	Yes	3	Yes
Faculty of Medicine	Female	18	Right Handed	7 Day/Week	10	Social Media		100	Two hands	Sitting position	Yes	Neck, Right Shoulder	4	1	Throughout the day	5	No	I Did Not Use Any Agent	0 (Do not use analgesics)	No	No	No	0	Yes
Faculty of Medicine	Female	20	Right Handed	7 Day/Week	14	Studying, Texting, Social Media, Watching Videos	3	10	One hand	Supine position (Lying down)	No	I don't have pain	I dont have pain	0	I Don't have pain	0	No	I Did Not Use Any Agent	0 (Do not use analgesics)	No	I don't have pain	I don't have pain	0	I don't have pain, but i believe that this type of pain is related to mobile phones use
Faculty of Medicine	Female	19	Right Handed	2 Day/Week	6	Studying, Texting, Social Media, Watching Videos	2	1000	One hand	Supine position (Lying down)	No	I don't have pain	I dont have pain	0	I Don't have pain	0	No	I Did Not Use Any Agent	0 (Do not use analgesics)	No	No	No	0	I don't have pain, but i believe that this type of pain is related to mobile phones use
Faculty of Medicine	Female	20	Right Handed	1 Day/Week	6	Studying, Texting, Working, Social Media, Watching Videos	1	100	One hand	Sitting position	No	Neck, Right Shoulder	5	1	Throughout the day	6	No	I Did Not Use Any Agent	0 (Do not use analgesics)	No	No	No	6	Yes
Faculty of Rehabilitation	Female	18	Right Handed	1 Day/Week	12	Studying	10	500	Two hands	Standing position	Yes	Neck, Right Shoulder	4	4	At night	6	Yes	Alternatives to Analgesics: Relaxation techniques	5	Yes, I've Visited the Emergency Department	No	I don't have pain	3	I don't have pain, and I Don't believe that this type of pain is related to mobile phones use
Faculty of Medicine	Female	18	Left Handed	7 Day/Week	3	Studying, Texting, Social Media, Watching Videos	1	40	One hand	Sitting position	No	I don't have pain	I dont have pain	0	I Don't have pain	0	No	I Did Not Use Any Agent	0 (Do not use analgesics)	No	I don't have pain	I don't have pain	0	I don't have pain, but i believe that this type of pain is related to mobile phones use
Faculty of Medicine	Female	18	Right Handed	7 Day/Week	9	Studying, Texting, Playing Games, Social Media, Watching Videos	1	5	One hand	Sitting position	Yes	Neck, Left Shoulder	4	2	At night	4	Yes	Alternatives to Analgesics: Rest	3	No	Yes	Yes	3	Yes
Faculty of Dentistry	Female	18	Right Handed	7 Day/Week	24	Studying, Texting, Working, Playing Games, Social Media, Watching Videos	1	500	Two hands	Supine position (Lying down)	No	I don't have pain	I dont have pain	0	I Don't have pain	0	No	I Did Not Use Any Agent	0 (Do not use analgesics)	No	I don't have pain	I don't have pain	0	I don't have pain, but i believe that this type of pain is related to mobile phones use
Faculty of Medicine	Female	18	Right Handed	7 Day/Week	24	Studying, Texting, Social Media, Watching Videos	2	10	One hand	Standing position	Yes	Neck	1	1	Throughout the day	3	No	I Did Not Use Any Agent	0 (Do not use analgesics)	No	No	No	2	Yes
Faculty of Pharmacy	Male	20	Left Handed	7 Day/Week	4	Texting, Working, Playing Games, Social Media, Watching Videos		200	One hand	Supine position (Lying down)	Yes	Neck, Left Shoulder	5	7	Throughout the day	4	No	I Did Not Use Any Agent	0 (Do not use analgesics)	No	No	Yes	3	Yes
Faculty of Dentistry	Female	20	Right Handed	7 Day/Week	5	Studying, Texting, Social Media, Watching Videos	1	6	One hand	Sitting position	Yes	Neck, Right Shoulder, Left Shoulder	7	2	Throughout the day	2	Yes	Nonsteroidal Anti-Inflammatory Drugs (ibuprofen, panadol naproxen, and Aspirin...etc)	0 (Do not use analgesics)	No	No	Yes	2	Yes
Faculty of Medicine	Male	22	Right Handed	7 Day/Week	1	Texting, Social Media		10	One hand	Sitting position	No	I don't have pain	I dont have pain	0	I Don't have pain	0	No	I Did Not Use Any Agent	0 (Do not use analgesics)	No	I don't have pain	I don't have pain	0	I don't have pain, but i believe that this type of pain is related to mobile phones use
Faculty of Nursing	Female	18	Right Handed	7 Day/Week	24	Studying, Texting, Playing Games	3	16	One hand	Sitting position	No	I don't have pain	I dont have pain	0	I Don't have pain	0	No	I Did Not Use Any Agent	0 (Do not use analgesics)	No	I don't have pain	I don't have pain	0	I don't have pain, but i believe that this type of pain is related to mobile phones use
Faculty of Medicine	Male	22	Right Handed	7 Day/Week	7	Texting, Working, Playing Games, Social Media, Watching Videos	1	2000	Two hands	Sitting position	No	I don't have pain	I dont have pain	0	I Don't have pain	0	No	I Did Not Use Any Agent	0 (Do not use analgesics)	No	I don't have pain	I don't have pain	0	I don't have pain, but i believe that this type of pain is related to mobile phones use
Faculty of Medicine	Female	16	Right Handed	2 Day/Week	6	Social Media			One hand	Sitting position	Yes	Neck	1	1	In the Afternoon	1	No	I Did Not Use Any Agent	0 (Do not use analgesics)	No	No	Yes	0	Yes
Faculty of Rehabilitation	Female	20	Right Handed	7 Day/Week	8	Studying, Social Media, Watching Videos	3		Two hands	Sitting position	Yes	Neck, Right Shoulder	1	24	Throughout the day	5	Yes	Alternatives to Analgesics: Massage, Alternatives to Analgesics: Rest, Alternatives to Analgesics: Relaxation techniques	1	Yes, I've visited the Clinic	No	Yes	0	No
Faculty of Medicine	Male	18	Right Handed	2 Day/Week	4	Texting, Social Media, Watching Videos		10	One hand	Sitting position	Yes	Neck, Right Shoulder	1	0	At night	1	Yes	استلقي على ظهري	1	No	Yes	Yes	4	Yes
Faculty of Pharmacy	Female	24	Right Handed	7 Day/Week	5	Studying, Texting, Working, Social Media, Watching Videos	3	40	Two hands	Sitting position	Yes	Neck, Right Shoulder, Left Shoulder	6	5	Throughout the day	5	No	I Did Not Use Any Agent	0 (Do not use analgesics)	No	No	Yes	5	Yes
Faculty of Dentistry	Male	18	Right Handed	7 Day/Week	10	Social Media			One hand	Sitting position	Yes	Neck, Right Shoulder	1	3	In the morning	3	No	I Did Not Use Any Agent	0 (Do not use analgesics)	No	No	Yes	0	Yes
Faculty of Medicine	Male	23	Right Handed	7 Day/Week	3	Studying, Texting, Working, Playing Games, Social Media, Watching Videos	1	5	Two hands	Sitting position	No	I don't have pain	I dont have pain	0	I Don't have pain	0	No	I Did Not Use Any Agent	0 (Do not use analgesics)	No	I don't have pain	I don't have pain	0	I don't have pain, but i believe that this type of pain is related to mobile phones use
Faculty of Medicine	Male	24	Right Handed	7 Day/Week	2	Texting, Social Media, Watching Videos		4	One hand	Sitting position	No	I don't have pain	I dont have pain	0	I Don't have pain	0	No	I Did Not Use Any Agent	0 (Do not use analgesics)	No	I don't have pain	I don't have pain	0	I don't have pain, but i believe that this type of pain is related to mobile phones use
Faculty of Medicine	Male	23	Right Handed	7 Day/Week	6	Social Media, Watching Videos			Two hands	Sitting position	Yes	Neck	1	1	At night	2	No	I Did Not Use Any Agent	0 (Do not use analgesics)	No	No	Yes	0	Yes
Faculty of Medicine	Male	19	Right Handed	7 Day/Week	8	Studying, Texting, Social Media, Watching Videos	1		One hand	Supine position (Lying down)	Yes	Left Shoulder	1	0.05	Throughout the day	4	No	I Did Not Use Any Agent	0 (Do not use analgesics)	No	No	No	4	No
Faculty of Medicine	Male	23	Right Handed	7 Day/Week	3	Studying, Playing Games, Social Media		30	One hand	Sitting position	Yes	Neck	3	1	Throughout the day	3	No	I Did Not Use Any Agent	0 (Do not use analgesics)	No	Yes	Yes	2	Yes
Faculty of Medicine	Female	22	Right Handed	7 Day/Week	3	Studying, Texting, Social Media	2	1	Two hands	Sitting position	Yes	Neck	1	2	In the Afternoon	4	Yes	Nonsteroidal Anti-Inflammatory Drugs (ibuprofen, panadol naproxen, and Aspirin...etc)	1	Yes, I've visited the Clinic	Yes	Yes	2	Yes
Faculty of Medicine	Male	23	Right Handed	7 Day/Week	4	Studying, Texting, Working, Playing Games, Social Media, Watching Videos	1	5	Two hands	Sitting position	Yes	Neck	2	0.5	At night	3	No	I Did Not Use Any Agent	0 (Do not use analgesics)	No	No	Yes	0	Yes
Faculty of Medicine	Male	23	Right Handed	6 Day/Week	4	Studying, Texting, Social Media	1	12	Two hands	Sitting position	No	I don't have pain	I dont have pain	0	I Don't have pain	0	No	Alternatives to Analgesics: Rest	0 (Do not use analgesics)	No	I don't have pain	Yes	0	I don't have pain, but i believe that this type of pain is related to mobile phones use
Faculty of Dentistry	Female	18	Right Handed	1 Day/Week	20	Studying, Texting, Social Media, Watching Videos	5	18	Two hands	Supine position (Lying down)	Yes	Neck, Right Shoulder, Left Shoulder	5	4	Throughout the day	5	No	I Did Not Use Any Agent	0 (Do not use analgesics)	No	No	No	5	Yes
Faculty of Medicine	Male	19	Right Handed	7 Day/Week	3	Studying, Texting, Social Media, Watching Videos	1	100	Two hands	Sitting position	Yes	Neck, Right Shoulder, Left Shoulder	7	2	At night	7	Yes	I Did Not Use Any Agent	2	Yes, I've Visited the Emergency Department	No	No	2	I don't have pain, and I Don't believe that this type of pain is related to mobile phones use
Faculty of Medicine	Male	22	Right Handed	7 Day/Week	1	Texting, Social Media, Watching Videos		20	Two hands	Sitting position	No	I don't have pain	I dont have pain	0	I Don't have pain	0	No	I Did Not Use Any Agent	0 (Do not use analgesics)	No	I don't have pain	I don't have pain	0	I don't have pain, but i believe that this type of pain is related to mobile phones use
Faculty of Medicine	Male	22	Right Handed	7 Day/Week	3	Texting, Playing Games, Social Media, Watching Videos		30	One hand	Supine position (Lying down)	Yes	Neck	3	3	At night	4	No	Alternatives to Analgesics: Rest	3	No	No	Yes	1	Yes
Faculty of Nursing	Male	23	Right Handed	7 Day/Week	13	Studying, Texting, Working, Playing Games, Social Media, Watching Videos	1	10	Two hands	Walking position	Yes	Neck	2	5	Throughout the day	3	No	I Did Not Use Any Agent	0 (Do not use analgesics)	No	No	Yes	2	Yes
Faculty of Nursing	Female	20	Right Handed	2 Day/Week	3.5	Studying, Working, Social Media, Watching Videos	2		One hand	Sitting position	Yes	Neck	1	1	At night	4	No	I Did Not Use Any Agent	0 (Do not use analgesics)	No	Yes	Yes	0	Yes
Faculty of Nursing	Female	22	Right Handed	7 Day/Week	3	Studying, Texting, Social Media, Watching Videos	4	20	One hand	Sitting position	Yes	Neck, Right Shoulder	3	1	In the Afternoon	3	No	I Did Not Use Any Agent	0 (Do not use analgesics)	No	Yes	Yes	1	Yes
Faculty of Nursing	Female	20	Right Handed	7 Day/Week	6	Studying, Texting, Playing Games, Social Media, Watching Videos	8	40	Two hands	Supine position (Lying down)	Yes	Neck, Right Shoulder, Left Shoulder	1	2	In the Afternoon	2	Yes	Alternatives to Analgesics: Heat, Alternatives to Analgesics: Massage, Alternatives to Analgesics: Rest, Alternatives to Analgesics: Relaxation techniques	0 (Do not use analgesics)	No	No	Yes	3	Yes
Faculty of Nursing	Female	25	Right Handed	7 Day/Week	2	Studying, Texting, Social Media	1	3	One hand	Sitting position	Yes	Right Shoulder, Left Shoulder	2	2	Throughout the day	3	No	I Did Not Use Any Agent	0 (Do not use analgesics)	No	No	No	3	Yes
Faculty of Rehabilitation	Male	22	Right Handed	7 Day/Week	10	Social Media			Two hands	Sitting position	Yes	Neck, Right Shoulder, Left Shoulder	3	1	Throughout the day	4	No	I Did Not Use Any Agent	0 (Do not use analgesics)	No	Yes	Yes	3	Yes
Faculty of Rehabilitation	Female	23	Right Handed	7 Day/Week	12	Studying, Texting, Playing Games, Social Media, Watching Videos	2	10000	One hand	Sitting position	Yes	Neck, Right Shoulder, Left Shoulder	3	1	Throughout the day	3	No	I Did Not Use Any Agent	0 (Do not use analgesics)	No	No	Yes	3	Yes
Faculty of Rehabilitation	Female	22	Right Handed	5 Day/Week	8	Studying, Texting, Social Media, Watching Videos	2	5	One hand	Sitting position	Yes	Right Shoulder	4	3	Throughout the day	4	No	I Did Not Use Any Agent	0 (Do not use analgesics)	No	No	No	4	No
Faculty of Rehabilitation	Female	23	Right Handed	7 Day/Week	15	Texting		50	One hand	Sitting position	No	I don't have pain	I dont have pain	0	I Don't have pain	0	No	I Did Not Use Any Agent	0 (Do not use analgesics)	No	I don't have pain	I don't have pain	0	I don't have pain, but i believe that this type of pain is related to mobile phones use
Faculty of Rehabilitation	Female	22	Right Handed	7 Day/Week	5	Texting, Working, Social Media, Watching Videos		1	Two hands	Supine position (Lying down)	No	I don't have pain	I dont have pain	0	I Don't have pain	0	No	I Did Not Use Any Agent	0 (Do not use analgesics)	No	I don't have pain	I don't have pain	0	I don't have pain, but i believe that this type of pain is related to mobile phones use
Faculty of Rehabilitation	Female	23	Right Handed	7 Day/Week	6	Studying, Social Media, Watching Videos	1		One hand	Supine position (Lying down)	Yes	Neck	3	2	Throughout the day	4	No	I Did Not Use Any Agent	0 (Do not use analgesics)	No	No	Yes	3	Yes
Faculty of Rehabilitation	Female	22	Right Handed	7 Day/Week	7	Studying, Texting, Social Media, Watching Videos	3	1	One hand	Sitting position	Yes	Neck	2	2	In the morning	4	No	I Did Not Use Any Agent	0 (Do not use analgesics)	No	Yes	Yes	1	No
Faculty of Rehabilitation	Female	22	Right Handed	7 Day/Week	5	Studying, Texting, Playing Games, Social Media, Watching Videos	1	200	One hand	Sitting position	No	Neck	5	1	Throughout the day	3	No	I Did Not Use Any Agent	0 (Do not use analgesics)	No	Yes	Yes	0	No
Faculty of Nursing	Female	21	Right Handed	1 Day/Week	4	Studying, Watching Videos	2	2	One hand	Sitting position	No	I don't have pain	I dont have pain	0	I Don't have pain	0	No	I Did Not Use Any Agent	0 (Do not use analgesics)	No	I don't have pain	I don't have pain	0	I don't have pain, but i believe that this type of pain is related to mobile phones use
Faculty of Nursing	Female	20	Right Handed	7 Day/Week	6	Studying, Social Media, Watching Videos	2		One hand	Sitting position	Yes	Neck	4	4	At night	6	Yes	Nonsteroidal Anti-Inflammatory Drugs (ibuprofen, panadol naproxen, and Aspirin...etc), Alternatives to Analgesics: Ice, Alternatives to Analgesics: Massage, Alternatives to Analgesics: Rest, Alternatives to Analgesics: Relaxation techniques	3	Yes, I've visited the Clinic	No	Yes	6	No
Faculty of Pharmacy	Female	20	Right Handed	1 Day/Week	3	Watching Videos			Two hands	Supine position (Lying down)	Yes	Neck, Right Shoulder, Left Shoulder	1	0	Throughout the day	2	No	I Did Not Use Any Agent	0 (Do not use analgesics)	No	No	Yes	1	Yes
Faculty of Pharmacy	Female	21	Right Handed	7 Day/Week	10	Studying, Texting, Working, Social Media	2	5	One hand	Sitting position	Yes	Neck	1	1	At night	3	No	I Did Not Use Any Agent	0 (Do not use analgesics)	No	Yes	Yes	2	Yes
Faculty of Medicine	Male	21	Right Handed	7 Day/Week	3	Texting, Social Media, Watching Videos		1	Two hands	Sitting position	Yes	Left Shoulder	1	1	In the morning	4	No	I Did Not Use Any Agent	0 (Do not use analgesics)	No	Yes	No	3	No
Faculty of Medicine	Male	21	Right Handed	7 Day/Week	6	Texting, Social Media, Watching Videos			One hand	Sitting position	No	I don't have pain	I dont have pain	0	I Don't have pain	0	No	I Did Not Use Any Agent	0 (Do not use analgesics)	No	No	No	0	I don't have pain, but i believe that this type of pain is related to mobile phones use
Faculty of Medicine	Female	21	Right Handed	7 Day/Week	6	Texting, Playing Games, Watching Videos	2	50	One hand	Supine position (Lying down)	No	I don't have pain	I dont have pain	0	I Don't have pain	0	No	I Did Not Use Any Agent	0 (Do not use analgesics)	No	I don't have pain	I don't have pain	0	I don't have pain, but i believe that this type of pain is related to mobile phones use
Faculty of Medicine	Male	21	Right Handed	1 Day/Week	3	Social Media			Two hands	Sitting position	Yes	Neck	4	1	Throughout the day	5	No	I Did Not Use Any Agent	0 (Do not use analgesics)	No	No	Yes	2	Yes
Faculty of Medicine	Female	22	Right Handed	1 Day/Week	5	Studying, Social Media, Watching Videos	2	20	One hand	Supine position (Lying down)	No	Neck, I don't have pain	I dont have pain	0	I Don't have pain	7	No	I Did Not Use Any Agent	0 (Do not use analgesics)	No	No	No	4	I don't have pain, and I Don't believe that this type of pain is related to mobile phones use
Faculty of Medicine	Female	22	Right Handed	1 Day/Week	5	Studying, Social Media, Watching Videos	2	20	One hand	Supine position (Lying down)	No	Neck, I don't have pain	I dont have pain	0	I Don't have pain	7	No	I Did Not Use Any Agent	0 (Do not use analgesics)	No	No	No	4	I don't have pain, and I Don't believe that this type of pain is related to mobile phones use
Faculty of Medicine	Female	21	Left Handed	7 Day/Week	15	Texting, Social Media, Watching Videos		150	Two hands	Sitting position	Yes	Neck	1	2	At night	2	No	I Did Not Use Any Agent	0 (Do not use analgesics)	No	No	Yes	1	Yes
Faculty of Medicine	Female	21	Right Handed	7 Day/Week	5	Studying, Social Media	3		Two hands	Sitting position	Yes	Neck	1	1	Throughout the day	1	No	I Did Not Use Any Agent	0 (Do not use analgesics)	No	Yes	Yes	0	Yes
Faculty of Medicine	Female	22	Left Handed	7 Day/Week	1.5	Working, Social Media		5	Two hands	Sitting position	Yes	Right Shoulder, Left Shoulder	6	8	Throughout the day	5	No	I Did Not Use Any Agent	0 (Do not use analgesics)	No	Yes	No	5	No
Faculty of Medicine	Female	20	Right Handed	7 Day/Week	3	Studying, Texting, Social Media, Watching Videos	1	15	One hand	Supine position (Lying down)	Yes	Right Shoulder, Left Shoulder	1	2	Throughout the day	1	No	I Did Not Use Any Agent	0 (Do not use analgesics)	Yes, I've visited the Clinic	No	Yes	0	No
Faculty of Medicine	Female	21	Right Handed	7 Day/Week	8	Studying, Texting, Social Media	2	1	Two hands	Sitting position	Yes	Neck, Right Shoulder, Left Shoulder	3	12	In the morning	3	No	I Did Not Use Any Agent	0 (Do not use analgesics)	No	No	No	3	No
Faculty of Medicine	Male	20	Right Handed	7 Day/Week	7	Texting, Playing Games, Social Media, Watching Videos		2	Two hands	Sitting position	Yes	Neck	1	1	At night	4	No	I Did Not Use Any Agent	0 (Do not use analgesics)	No	No	Yes	4	Yes
Faculty of Medicine	Male	21	Right Handed	7 Day/Week	6	Texting, Playing Games, Social Media, Watching Videos		6	Two hands	Sitting position	Yes	Neck	3	1	In the morning	2	No	I Did Not Use Any Agent	0 (Do not use analgesics)	No	No	No	2	Yes
Faculty of Medicine	Female	21	Right Handed	7 Day/Week	8	Social Media		100	Two hands	Sitting position	No	I don't have pain	I dont have pain	0	I Don't have pain	0	No	I Did Not Use Any Agent	3	No	I don't have pain	I don't have pain	0	I don't have pain, but i believe that this type of pain is related to mobile phones use
Faculty of Medicine	Female	20	Right Handed	7 Day/Week	5	Studying, Texting, Working, Social Media, Watching Videos	1	50	Two hands	Sitting position	No	I don't have pain	I dont have pain	0	I Don't have pain	0	No	I Did Not Use Any Agent	0 (Do not use analgesics)	No	I don't have pain	I don't have pain	0	I don't have pain, but i believe that this type of pain is related to mobile phones use
Faculty of Medicine	Male	24	Right Handed	7 Day/Week	8	Studying, Texting, Working, Social Media	2	100	Two hands	Sitting position	Yes	Neck	2	2	Throughout the day	3	No	I Did Not Use Any Agent	0 (Do not use analgesics)	No	Yes	Yes	2	Yes
Faculty of Medicine	Female	20	Right Handed	7 Day/Week	5	Studying	2.5		One hand	Sitting position	Yes	Right Shoulder	7	1	Throughout the day	4	No	I Did Not Use Any Agent	0 (Do not use analgesics)	No	No	Yes	4	No
Faculty of Rehabilitation	Female	22	Right Handed	7 Day/Week	10	Studying, Texting, Working, Social Media, Watching Videos	2	2	One hand	Standing position	Yes	Right Shoulder	4	6	Throughout the day	3	No	Nonsteroidal Anti-Inflammatory Drugs (ibuprofen, panadol naproxen, and Aspirin...etc), Alternatives to Analgesics: Ice, Alternatives to Analgesics: Massage	1	No	No	No	3	No
Faculty of Medicine	Female	21	Right Handed	7 Day/Week	4	Social Media			One hand	Sitting position	No	I don't have pain	I dont have pain	0	I Don't have pain	0	No	I Did Not Use Any Agent	0 (Do not use analgesics)	No	I don't have pain	I don't have pain	0	I don't have pain, but i believe that this type of pain is related to mobile phones use
Faculty of Nursing	Male	22	Right Handed	7 Day/Week	1	Texting, Social Media		5	One hand	Sitting position	No	I don't have pain	I dont have pain	0	I Don't have pain	0	No	I Did Not Use Any Agent	0 (Do not use analgesics)	No	I don't have pain	I don't have pain	0	I don't have pain, but i believe that this type of pain is related to mobile phones use
Faculty of Nursing	Male	21	Right Handed	7 Day/Week	4	Texting, Playing Games, Social Media, Watching Videos		30	One hand	Supine position (Lying down)	Yes	Neck	5	6	Throughout the day	6	Yes	Nonsteroidal Anti-Inflammatory Drugs (ibuprofen, panadol naproxen, and Aspirin...etc), Alternatives to Analgesics: Massage, Alternatives to Analgesics: Rest, Alternatives to Analgesics: Relaxation techniques	5	No	No	Yes	4	Yes
Faculty of Medicine	Female	20	Right Handed	1 Day/Week	5	Studying, Texting, Social Media, Watching Videos	4	5	Two hands	Supine position (Lying down)	Yes	Neck	1	1	In the morning	1	No	I Did Not Use Any Agent	0 (Do not use analgesics)	No	No	No	1	No
Faculty of Medicine	Female	20	Right Handed	7 Day/Week	4	Watching Videos			One hand	Sitting position	Yes	Left Shoulder	1	12	Throughout the day	5	No	I Did Not Use Any Agent	0 (Do not use analgesics)	No	Yes	Yes	2	Yes
Faculty of Medicine	Female	22	Right Handed	7 Day/Week	12	Studying, Texting, Social Media	5	2	One hand	Standing position	Yes	Neck, Right Shoulder	4	3	Throughout the day	3	No	I Did Not Use Any Agent	0 (Do not use analgesics)	No	No	Yes	3	Yes
Faculty of Medicine	Male	19	Right Handed	7 Day/Week	7	Texting, Playing Games, Social Media, Watching Videos		200	Two hands	Supine position (Lying down)	Yes	Neck, Right Shoulder, Left Shoulder	3	3	In the Afternoon	3	No	I Did Not Use Any Agent	0 (Do not use analgesics)	No	No	Yes	4	Yes
Faculty of Rehabilitation	Female	25	Right Handed	7 Day/Week	4	Texting, Working, Social Media, Watching Videos	1	15	One hand	Standing position	Yes	Right Shoulder, Left Shoulder	1	0	In the morning	4	No	I Did Not Use Any Agent	1	No	No	Yes	5	Yes
Faculty of Medicine	Male	18	Right Handed	3 Day/Week	3	Studying, Texting, Working, Watching Videos	2	30	Two hands	Sitting position	No	I don't have pain	I dont have pain	0	I Don't have pain	0	No	I Did Not Use Any Agent	0 (Do not use analgesics)	No	I don't have pain	I don't have pain	0	I don't have pain, but i believe that this type of pain is related to mobile phones use
Faculty of Medicine	Male	20	Right Handed	7 Day/Week	3	Texting, Working, Social Media, Watching Videos		40	One hand	Sitting position	Yes	Neck, I don't have pain	1	0	At night	2	No	I Did Not Use Any Agent	0 (Do not use analgesics)	No	No	No	2	Yes
Faculty of Medicine	Male	22	Right Handed	7 Day/Week	4	Texting, Social Media, Watching Videos		200	Two hands	Sitting position	Yes	Neck	5	3	Throughout the day	4	Yes	Nonsteroidal Anti-Inflammatory Drugs (ibuprofen, panadol naproxen, and Aspirin...etc), Alternatives to Analgesics: Relaxation techniques	1	Yes, I've visited the Clinic	Yes	No	3	Yes
Faculty of Medicine	Male	18	Right Handed	7 Day/Week	3	Studying, Social Media, Watching Videos	1	2	One hand	Supine position (Lying down)	Yes	I don't have pain	I dont have pain	0	I Don't have pain	0	No	I Did Not Use Any Agent	0 (Do not use analgesics)	No	I don't have pain	I don't have pain	0	I don't have pain, and I Don't believe that this type of pain is related to mobile phones use
Faculty of Medicine	Female	20	Right Handed	7 Day/Week	7	Social Media, Watching Videos			One hand	Sitting position	Yes	Neck	1	2	In the Afternoon	2	No	I Did Not Use Any Agent	0 (Do not use analgesics)	No	No	Yes	1	Yes
Faculty of Medicine	Male	21	Left Handed	7 Day/Week	3	Studying, Texting, Working	2.5	15	One hand	Sitting position	No	I don't have pain	I dont have pain	0	I Don't have pain	0	No	I Did Not Use Any Agent	0 (Do not use analgesics)	No	I don't have pain	I don't have pain	0	I don't have pain, and I Don't believe that this type of pain is related to mobile phones use
Faculty of Medicine	Female	20	Right Handed	2 Day/Week	3.5	Social Media			One hand	Sitting position	Yes	Neck	1	0	In the morning	1	No	I Did Not Use Any Agent	0 (Do not use analgesics)	No	No	No	1	No
Faculty of Medicine	Female	20	Right Handed	2 Day/Week	3.5	Social Media			One hand	Sitting position	Yes	Neck	1	0	In the morning	1	No	I Did Not Use Any Agent	0 (Do not use analgesics)	No	No	No	1	No
Faculty of Medicine	Male	20	Left Handed	7 Day/Week	3	Studying, Texting, Playing Games, Social Media, Watching Videos	1	200	One hand	Supine position (Lying down)	No	I don't have pain	I dont have pain	0	I Don't have pain	0	No	I Did Not Use Any Agent	0 (Do not use analgesics)	No	I don't have pain	I don't have pain	0	I don't have pain, but i believe that this type of pain is related to mobile phones use
Faculty of Medicine	Female	20	Left Handed	4 Day/Week	5	Studying, Texting, Social Media, Watching Videos	3	3	One hand	Sitting position	Yes	Neck, Right Shoulder, Left Shoulder	5	2	In the Afternoon	2	No	Alternatives to Analgesics: Rest	0 (Do not use analgesics)	No	No	Yes	3	No
Faculty of Medicine	Female	20	Right Handed	5 Day/Week	10	Studying, Social Media			Two hands	Sitting position	Yes	Neck, Left Shoulder	1	3	In the Afternoon	3	No	I did not use any agent	0 (Do not use analgesics)	No	No	Yes	3	Yes
Faculty of Medicine	Male	21	Right Handed	7 Day/Week	10	Studying, Texting, Working, Playing Games, Social Media, Watching Videos	1	3	One hand	Supine position (Lying down)	Yes	Neck	2	2	Throughout the day	2	No	I Did Not Use Any Agent	0 (Do not use analgesics)	No	Yes	No	3	No
Faculty of Medicine	Female	20	Right Handed	1 Day/Week	6	Studying, Texting, Working, Social Media, Watching Videos	1	10	Two hands	Sitting position	Yes	Neck, Right Shoulder, Left Shoulder	3	15	At night	3	No	I Did Not Use Any Agent	0 (Do not use analgesics)	No	No	Yes	1	Yes
Faculty of Nursing	Female	21	Right Handed	7 Day/Week	4	Studying, Texting, Social Media, Watching Videos	2	20	One hand	Supine position (Lying down)	Yes	Neck, Right Shoulder	7	3	At night	8	Yes	Nonsteroidal Anti-Inflammatory Drugs (ibuprofen, panadol naproxen, and Aspirin...etc), Alternatives to Analgesics: Heat, Alternatives to Analgesics: Massage, Alternatives to Analgesics: Rest	7	Yes, I've Visited the Emergency Department	No	Yes	5	Yes
Faculty of Nursing	Female	21	Right Handed	7 Day/Week	2	Texting, Social Media		10	Two hands	Sitting position	No	I don't have pain	I dont have pain	0	I Don't have pain	0	No	I Did Not Use Any Agent	0 (Do not use analgesics)	No	I don't have pain	I don't have pain	0	I don't have pain, and I Don't believe that this type of pain is related to mobile phones use
Faculty of Dentistry	Male	22	Right Handed	7 Day/Week	1.5	Texting, Playing Games, Social Media		5	One hand	Sitting position	No	I don't have pain	I dont have pain	0	I Don't have pain	0	No	I Did Not Use Any Agent	0 (Do not use analgesics)	No	I don't have pain	I don't have pain	0	I don't have pain, and I Don't believe that this type of pain is related to mobile phones use
Faculty of Nursing	Female	21	Right Handed	5 Day/Week	1	Texting		2	Two hands	Sitting position	No	I don't have pain	I dont have pain	0	I Don't have pain	0	No	I Did Not Use Any Agent	0 (Do not use analgesics)	No	I don't have pain	I don't have pain	0	I don't have pain, but i believe that this type of pain is related to mobile phones use
Faculty of Nursing	Male	21	Right Handed	7 Day/Week	2	Texting, Social Media		5	One hand	Walking position	No	I don't have pain	I dont have pain	0	I Don't have pain	0	No	I Did Not Use Any Agent	0 (Do not use analgesics)	No	I don't have pain	I don't have pain	0	I don't have pain, and I Don't believe that this type of pain is related to mobile phones use
Faculty of Nursing	Female	20	Right Handed	1 Day/Week	8	Studying, Social Media, Watching Videos	2	2	One hand	Sitting position	No	I don't have pain	I dont have pain	0	I Don't have pain	0	No	I Did Not Use Any Agent	0 (Do not use analgesics)	No	I don't have pain	I don't have pain	0	I don't have pain, but i believe that this type of pain is related to mobile phones use
Faculty of Medicine	Female	20	Right Handed	7 Day/Week	6	Texting, Social Media, Watching Videos		15	Two hands	Sitting position	No	I don't have pain	I dont have pain	0	I Don't have pain	0	No	I Did Not Use Any Agent	0 (Do not use analgesics)	No	I don't have pain	I don't have pain	0	I don't have pain, but i believe that this type of pain is related to mobile phones use
Faculty of Medicine	Male	23	Left Handed	7 Day/Week	3	Studying, Texting, Social Media, Watching Videos	1	50	Two hands	Sitting position	No	I don't have pain	I dont have pain	0	I Don't have pain	0	No	I Did Not Use Any Agent	0 (Do not use analgesics)	No	I don't have pain	I don't have pain	0	I don't have pain, but i believe that this type of pain is related to mobile phones use
Faculty of Medicine	Female	23	Right Handed	7 Day/Week	4	Studying, Texting, Social Media, Watching Videos	2	10	One hand	Supine position (Lying down)	Yes	Neck, Right Shoulder, Left Shoulder	1	2	At night	2	No	I Did Not Use Any Agent	0 (Do not use analgesics)	No	Yes	Yes	0	Yes
Faculty of Medicine	Male	25	Right Handed	7 Day/Week	8	Studying, Texting, Social Media, Watching Videos	2	10	One hand	Supine position (Lying down)	Yes	Neck, Right Shoulder	1	1	Throughout the day	3	No	I Did Not Use Any Agent	0 (Do not use analgesics)	No	Yes	Yes	4	Yes
Faculty of Medicine	Male	22	Right Handed	7 Day/Week	3	Texting, Social Media, Watching Videos		1	Two hands	Supine position (Lying down)	Yes	Neck, Right Shoulder	2	1	At night	2	No	I Did Not Use Any Agent	0 (Do not use analgesics)	No	Yes	Yes	1	No
Faculty of Dentistry	Male	20	Right Handed	7 Day/Week	4	Studying, Texting, Working, Playing Games, Social Media, Watching Videos	1	60	One hand	Supine position (Lying down)	No	I don't have pain	I dont have pain	0	I Don't have pain	0	No	I Did Not Use Any Agent	0 (Do not use analgesics)	No	I don't have pain	I don't have pain	0	I don't have pain, but i believe that this type of pain is related to mobile phones use
Faculty of Medicine	Female	26	Right Handed	7 Day/Week	10	Studying, Texting, Working	5	15	Two hands	Walking position	No	I don't have pain	I dont have pain	0	I Don't have pain	0	No	I Did Not Use Any Agent	0 (Do not use analgesics)	No	I don't have pain	I don't have pain	0	I don't have pain, and I Don't believe that this type of pain is related to mobile phones use
Faculty of Medicine	Male	27	Right Handed	7 Day/Week	7	Studying, Texting, Social Media, Watching Videos	1	4	Two hands	Sitting position	Yes	Neck	2	3	At night	3	Yes	Alternatives to Analgesics: Rest, I Did Not Use Any Agent	1	Yes, I've visited the Clinic	No	Yes	3	Yes
Faculty of Medicine	Female	22	Right Handed	7 Day/Week	3	Studying, Social Media, Watching Videos	1		One hand	Sitting position	Yes	Neck, Right Shoulder, Left Shoulder	1	3	In the morning	2	Yes	Nonsteroidal Anti-Inflammatory Drugs (ibuprofen, panadol naproxen, and Aspirin...etc), Alternatives to Analgesics: Massage	1	No	No	Yes	1	No
Faculty of Medicine	Male	22	Right Handed	7 Day/Week	5	Studying, Playing Games, Social Media, Watching Videos	1		One hand	Supine position (Lying down)	Yes	Neck, Right Shoulder	2	1	In the morning	3	No	I Did Not Use Any Agent	0 (Do not use analgesics)	No	Yes	Yes	0	Yes
Faculty of Nursing	Female	26	Right Handed	7 Day/Week	10	Studying, Texting, Working, Playing Games, Social Media, Watching Videos	8	20	One hand	Sitting position	Yes	Neck, Right Shoulder, Left Shoulder	5	0	Throughout the day	4	No	I Did Not Use Any Agent	1	No	Yes	Yes	5	Yes
Faculty of Medicine	Female	23	Right Handed	7 Day/Week	1	Studying, Texting	1	3	Two hands	Sitting position	No	I don't have pain	I dont have pain	0	I Don't have pain	0	No	I Did Not Use Any Agent	0 (Do not use analgesics)	No	I don't have pain	I don't have pain	0	I don't have pain, but i believe that this type of pain is related to mobile phones use
Faculty of Medicine	Male	21	Right Handed	1 Day/Week	4	Studying, Social Media, Watching Videos	1		One hand	Sitting position	No	I don't have pain	I dont have pain	0	I Don't have pain	0	No	I Did Not Use Any Agent	0 (Do not use analgesics)	No	I don't have pain	I don't have pain	0	I don't have pain, but i believe that this type of pain is related to mobile phones use
Faculty of Medicine	Male	25	Right Handed	5 Day/Week	6	Studying, Texting, Working, Social Media	3	8	One hand	Sitting position	Yes	Neck, Right Shoulder, Left Shoulder	3	1	In the Afternoon	5	Yes	Nonsteroidal Anti-Inflammatory Drugs (ibuprofen, panadol naproxen, and Aspirin...etc), Opioids, Alternatives to Analgesics: Massage, Alternatives to Analgesics: Rest, Alternatives to Analgesics: Relaxation techniques	3	Yes, I've visited the Clinic	Yes	Yes	1	Yes
Faculty of Medicine	Male	27	Right Handed	3 Day/Week	3	Studying, Texting, Working, Playing Games, Social Media, Watching Videos	1	200	One hand	Sitting position	Yes	Neck, Right Shoulder	3	1	Throughout the day	5	Yes	Nonsteroidal Anti-Inflammatory Drugs (ibuprofen, panadol naproxen, and Aspirin...etc)	2	No	No	Yes	5	Yes
Faculty of Medicine	Male	27	Right Handed	3 Day/Week	3	Studying, Texting, Working, Playing Games, Social Media, Watching Videos	1	200	One hand	Sitting position	Yes	Neck, Right Shoulder	3	1	Throughout the day	5	Yes	Nonsteroidal Anti-Inflammatory Drugs (ibuprofen, panadol naproxen, and Aspirin...etc)	2	No	No	Yes	5	Yes
Faculty of Medicine	Male	24	Right Handed	7 Day/Week	4	Studying, Texting, Working, Playing Games, Social Media	1	20	One hand	Sitting position	Yes	Right Shoulder	1	2	Throughout the day	3	No	I Did Not Use Any Agent	0 (Do not use analgesics)	Yes, I've visited the Clinic	No	Yes	0	No
Faculty of Pharmacy	Female	22	Right Handed	7 Day/Week	5	Studying, Texting, Social Media, Watching Videos	1	10	Two hands	Supine position (Lying down)	Yes	Neck, Left Shoulder	3	3	Throughout the day	4	Yes	Nonsteroidal Anti-Inflammatory Drugs (ibuprofen, panadol naproxen, and Aspirin...etc), Alternatives to Analgesics: Heat, Alternatives to Analgesics: Massage, Alternatives to Analgesics: Rest, Topical analgesics	1	Yes, I've visited the Clinic	No	No	4	Yes
Faculty of Medicine	Female	20	Right Handed	7 Day/Week	1	Studying, Social Media	1		One hand	Sitting position	Yes	Neck	2	3	At night	4	Yes	Neurological Analgesia (gabapentin, amitriptyline..etc)	1	No	Yes	No	2	No
Faculty of Dentistry	Female	24	Right Handed	2 Day/Week	5	Texting, Social Media		10	Two hands	Supine position (Lying down)	Yes	Neck, Right Shoulder	7	2	At night	4	No	I Did Not Use Any Agent	0 (Do not use analgesics)	No	Yes	Yes	3	Yes
Faculty of Nursing	Male	30	Right Handed	7 Day/Week	5	Studying, Working, Social Media	2	50	Two hands	Sitting position	Yes	Neck	5	2	Throughout the day	4	Yes	Alternatives to Analgesics: Rest	1	No	Yes	Yes	3	Yes
Faculty of Medicine	Male	27	Right Handed	7 Day/Week	18	Studying, Texting, Playing Games, Social Media, Watching Videos	5	2	Two hands	Sitting position	No	Neck	2	6	In the morning	5	Yes	Nonsteroidal Anti-Inflammatory Drugs (ibuprofen, panadol naproxen, and Aspirin...etc)	1	No	No	No	5	Yes
Faculty of Medicine	Male	26	Right Handed	7 Day/Week	5	Studying, Working, Playing Games, Watching Videos	1		One hand	Supine position (Lying down)	Yes	Right Shoulder	1	0	In the Afternoon	1	No	Alternatives to Analgesics: Rest, I Did Not Use Any Agent	0 (Do not use analgesics)	No	No	Yes	0	Yes
Faculty of Medicine	Female	24	Right Handed	7 Day/Week	7	Studying, Texting, Working, Social Media, Watching Videos	2	1	One hand	Sitting position	Yes	Neck, Right Shoulder, Left Shoulder	3	2	At night	4	Yes	Alternatives to Analgesics: Massage, Alternatives to Analgesics: Rest, Alternatives to Analgesics: Relaxation techniques	1	No	No	Yes	3	Yes
Faculty of Medicine	Male	23	Right Handed	7 Day/Week	15	Studying, Texting, Working, Playing Games, Social Media	5	12	One hand	Sitting position	No	Neck	2	1	In the morning	2	No	I Did Not Use Any Agent	0 (Do not use analgesics)	No	No	Yes	1	Yes
Faculty of Medicine	Female	23	Right Handed	7 Day/Week	7	Studying, Texting, Working, Playing Games, Social Media, Watching Videos	1	4	One hand	Sitting position	Yes	Left Shoulder	2	1	In the morning	5	No	I Did Not Use Any Agent	0 (Do not use analgesics)	No	No	Yes	4	Yes
Faculty of Medicine	Male	21	Right Handed	7 Day/Week	1	Texting, Social Media		15	Two hands	Sitting position	No	I don't have pain	I dont have pain	0	I Don't have pain	0	No	I Did Not Use Any Agent	0 (Do not use analgesics)	No	I don't have pain	I don't have pain	0	I don't have pain, and I Don't believe that this type of pain is related to mobile phones use
Faculty of Medicine	Male	22	Right Handed	6 Day/Week	6	Social Media			One hand	Sitting position	Yes	Neck	3	20	At night	6	No	Dont fuckin use	0 (Do not use analgesics)	No	No	Yes	2	Yes
Faculty of Pharmacy	Female	23	Right Handed	7 Day/Week	3	Texting, Social Media, Watching Videos		3	One hand	Walking position	Yes	Neck	3	3	At night	5	No	I Did Not Use Any Agent	0 (Do not use analgesics)	No	No	Yes	3	Yes
Faculty of Pharmacy	Female	22	Left Handed	7 Day/Week	2	Texting, Social Media		15	Two hands	Supine position (Lying down)	Yes	Right Shoulder	2	1	At night	3	No	I Did Not Use Any Agent	0 (Do not use analgesics)	No	No	No	3	Yes
Faculty of Pharmacy	Female	22	Right Handed	5 Day/Week	3	Studying, Texting, Social Media	1	10	One hand	Sitting position	No	I don't have pain	I dont have pain	0	I Don't have pain	0	No	I Did Not Use Any Agent	0 (Do not use analgesics)	No	I don't have pain	I don't have pain	0	I don't have pain, but i believe that this type of pain is related to mobile phones use
Faculty of Medicine	Male	20	Right Handed	7 Day/Week	1	Texting		10	Two hands	Supine position (Lying down)	No	I don't have pain	I dont have pain	0	I Don't have pain	0	No	I Did Not Use Any Agent	0 (Do not use analgesics)	No	I don't have pain	I don't have pain	0	I don't have pain, and I Don't believe that this type of pain is related to mobile phones use
